# Supplementary material for: Elucidation of several neglected reactions in the GC–MS identification of sialic acids as heptafluorobutyrates calls for an urgent reassessment of previous claims
Source: Royal Society of Chemistry journal article supplement (doi:10.1039/c5ob00081e), 2015-01-01
Supplement: c5ob00081e1.pdf [file c5ob00081e1.pdf]

## Supplementary Data

### **Elucidation of several neglected reactions in the GC-MS identification of sialic acids as heptafluorobutyrate calls for an urgent reassessment of previous claims**

**Paola Rota\***, Luigi Anastasia, Pietro Allevi

*Department of Biomedical, Surgical and Dental Sciences, University of Milan, via Saldini 50, I-20133 Milan, Italy; corresponding author: Paola Rota; Telephone: +39 02 50316047; Fax: +39 02 50316040; E-mail: paola.rota@unimi.it*

| <u>Contents</u>                                                                                                            | <u>Page Number</u> |
|----------------------------------------------------------------------------------------------------------------------------|--------------------|
| $^1\text{H}$ and $^{13}\text{C}$ NMR of Sias esters <b>1b</b> and <b>1c</b>                                                | S2-S3              |
| $^1\text{H}$ and $^{13}\text{C}$ NMR of 1,7 lactones <b>7b</b> , <b>4b</b> , <b>7c</b> , <b>7d</b> , <b>7e</b> , <b>4c</b> | S4-S9              |
| $^1\text{H}$ and $^{13}\text{C}$ NMR of crude 1,7 lactones <b>8b</b> , <b>8b</b>                                           | S10-S11            |
| $^1\text{H}$ and $^{13}\text{C}$ NMR of crude 1,7 lactones <b>9a-c</b>                                                     | S12-S14            |
| GC profile of HFB derivatives of Sias esters <b>1a-c</b>                                                                   | S15                |
| EI mass spectra of lactones <b>8a-c</b>                                                                                    | S16-S17            |
| EI mass spectra of methyl esters of sialic acids <b>1a-c</b>                                                               | S18-S19            |
| EI mass spectra of lactones <b>9a-c</b>                                                                                    | S20-S21            |

---

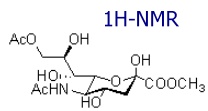

**methyl ester of 1b**

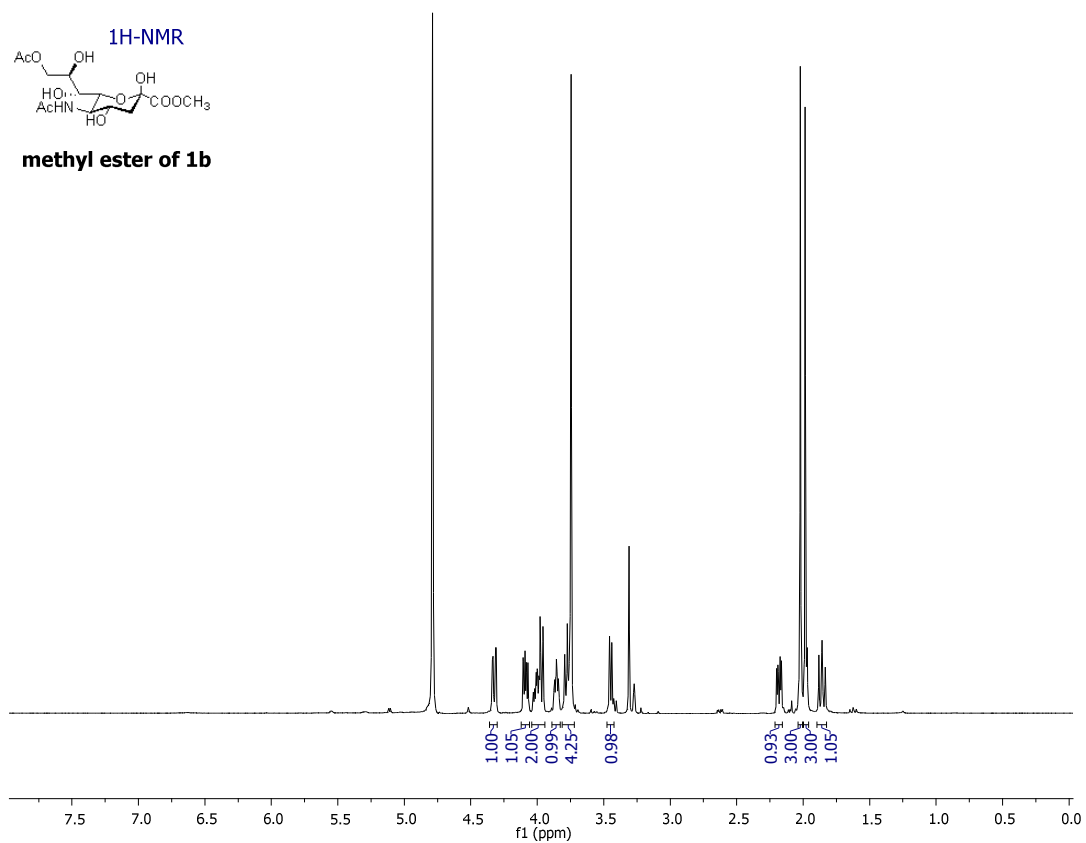

175.1  
173.1  
171.7

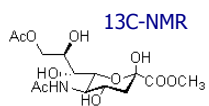

**methyl ester of 1b**

96.7

71.9  
70.4  
69.4

67.8  
67.8

54.3  
53.2

40.7

22.7  
20.8

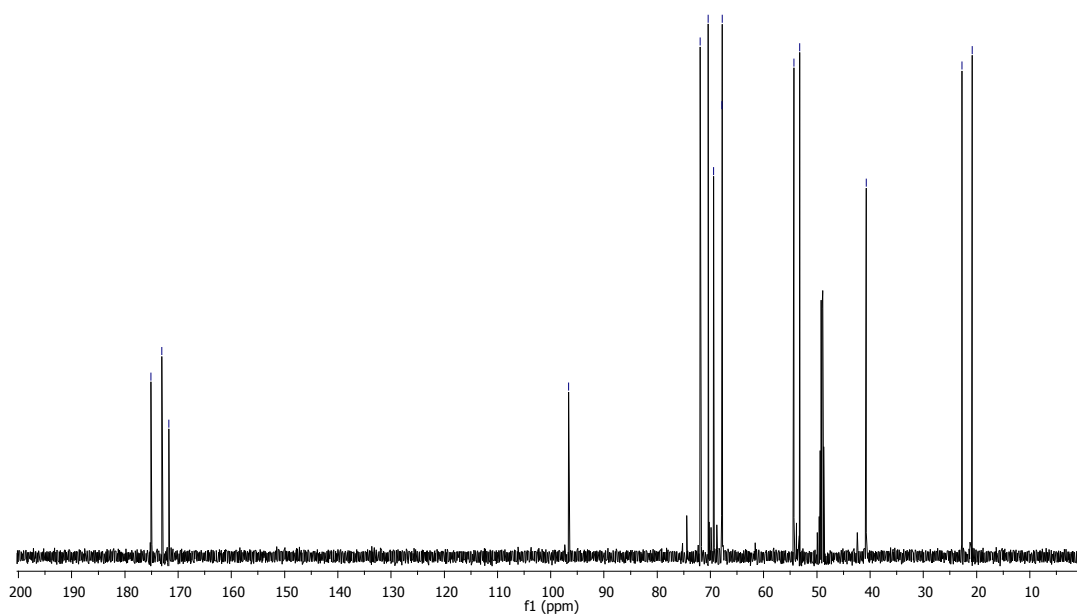

1H-NMR

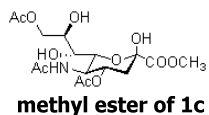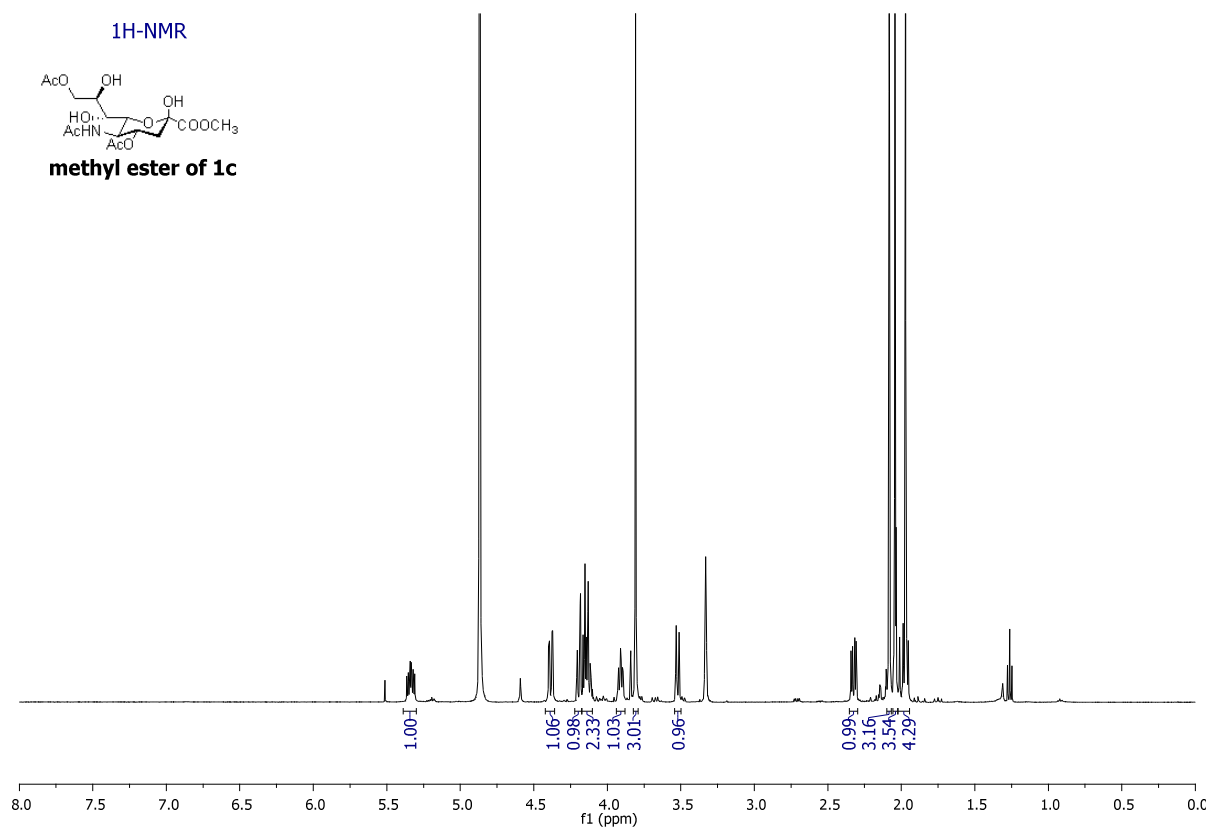

174.3  
173.1  
172.2  
171.4

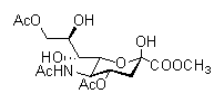

methyl ester of 1c

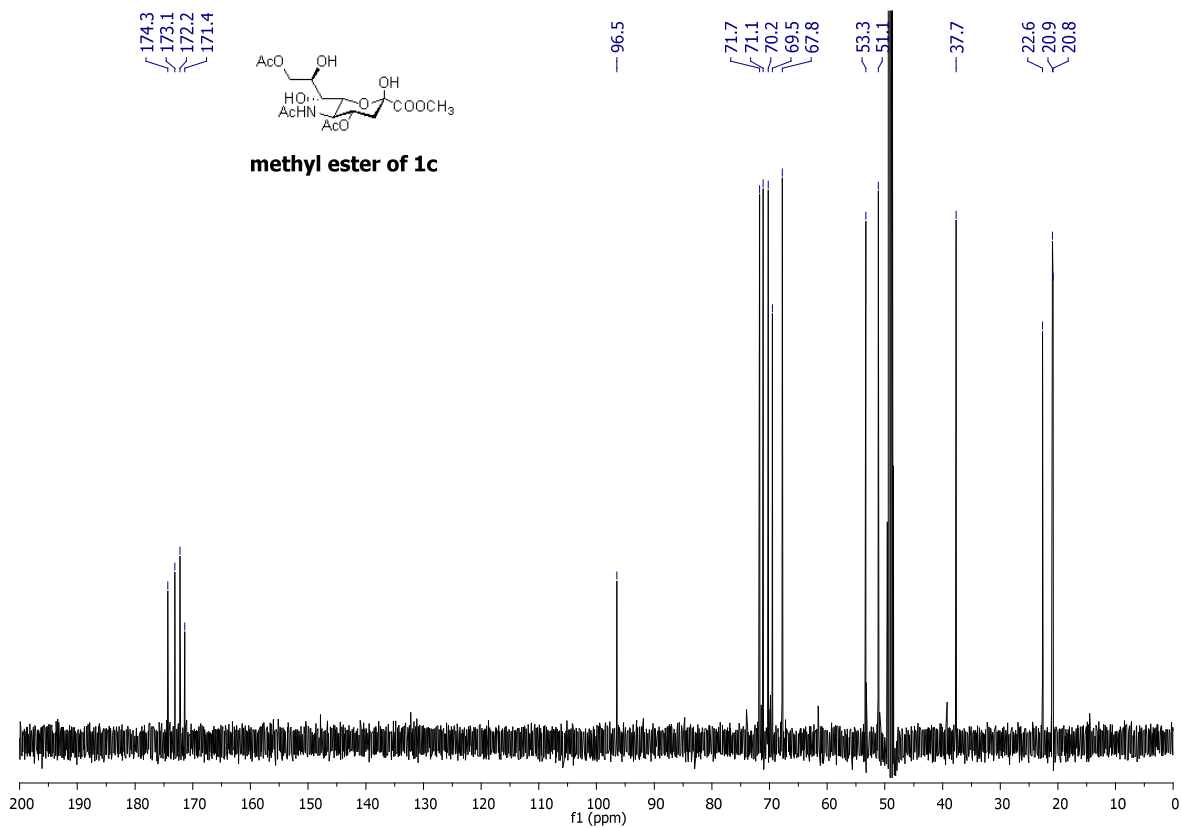

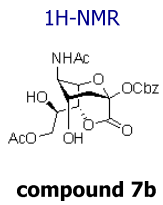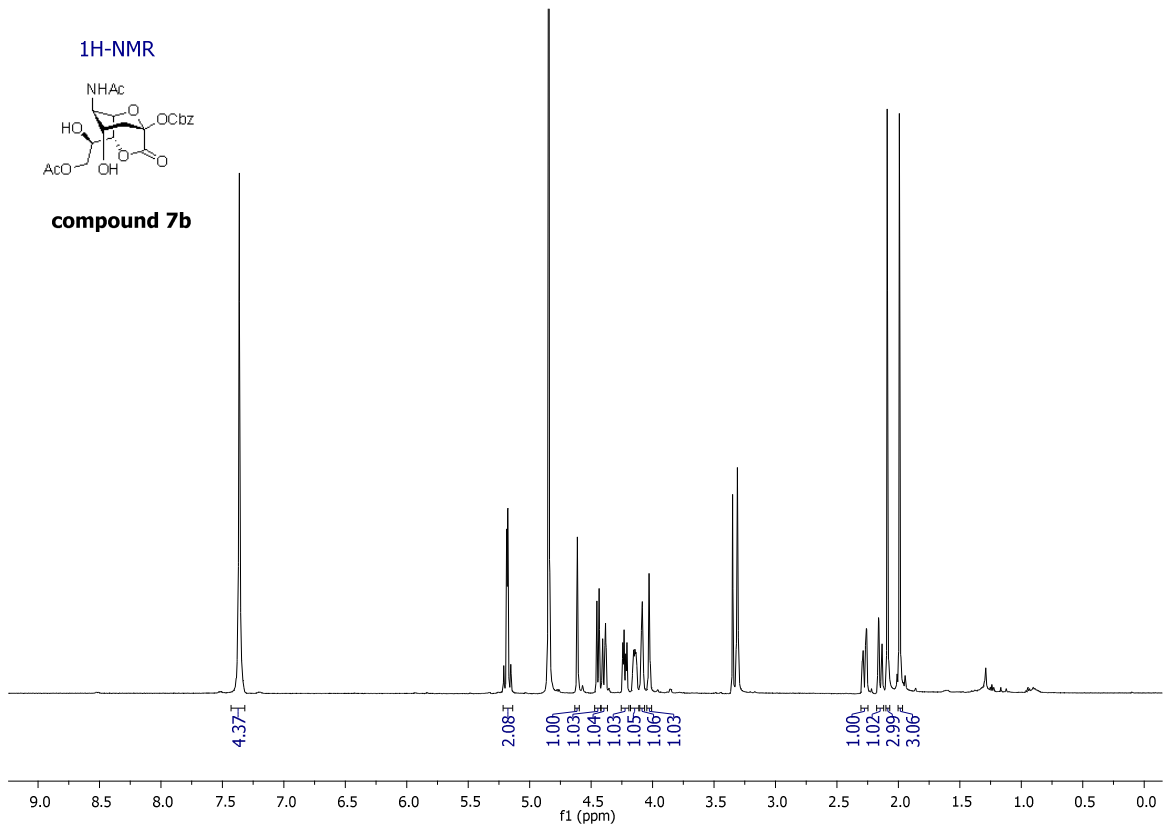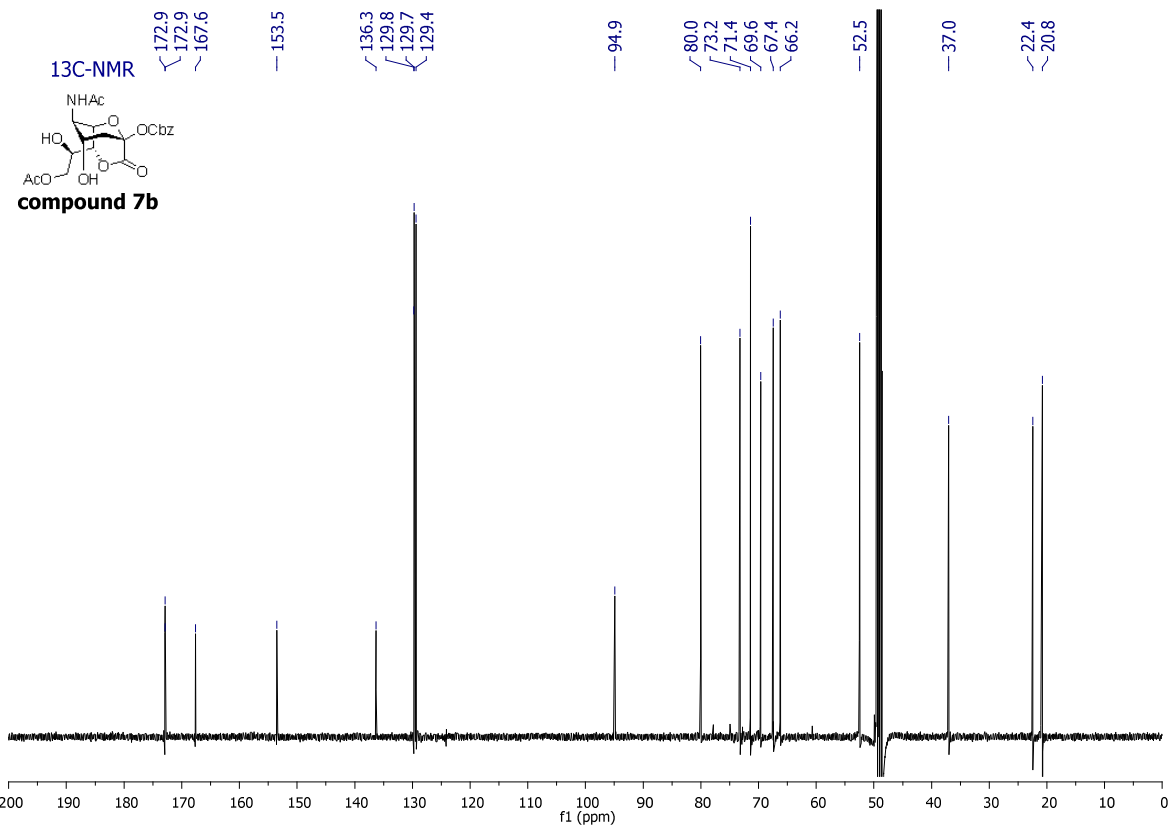

1H-NMR

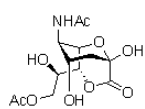

compound 4b

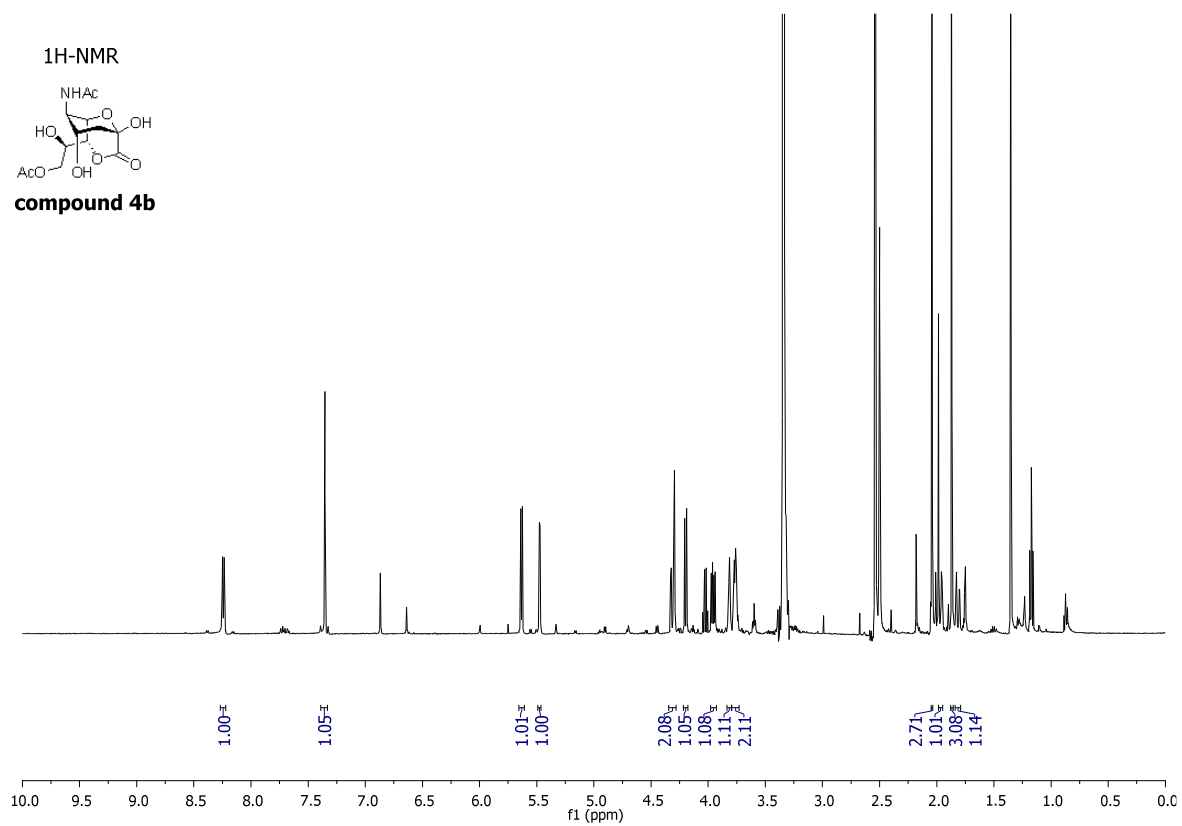

13C-NMR

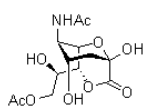

compound 4b

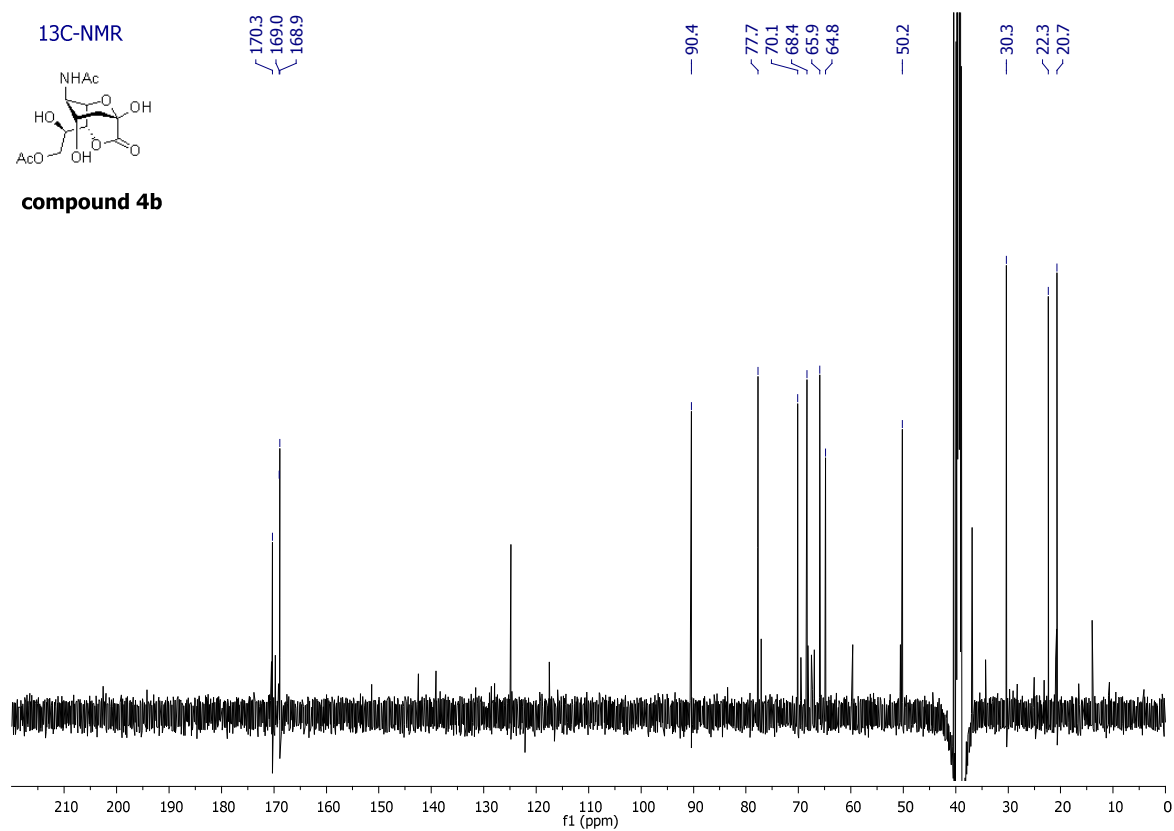

**<sup>1</sup>H-NMR**

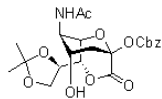

**compound 7c**

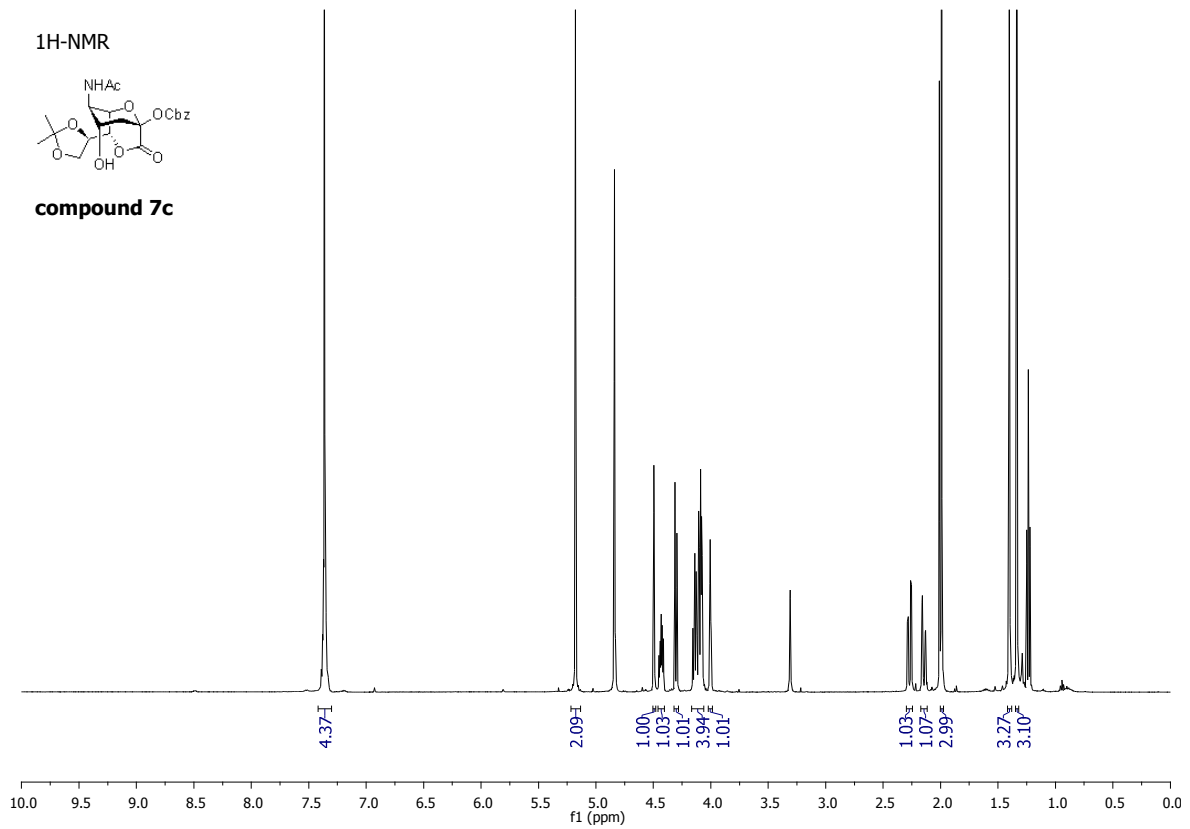

**<sup>13</sup>C-NMR**

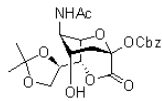

**compound 7c**

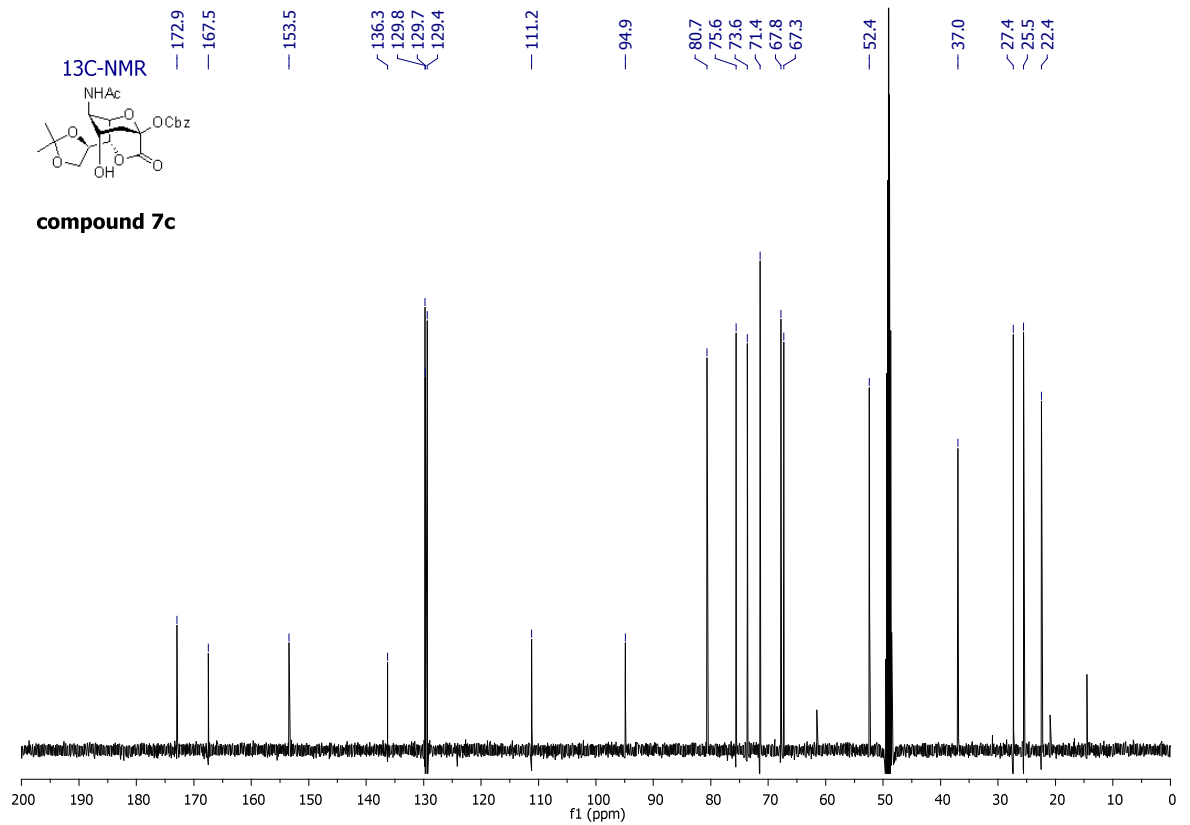

1H-NMR

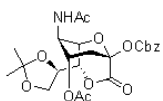

compound 7d

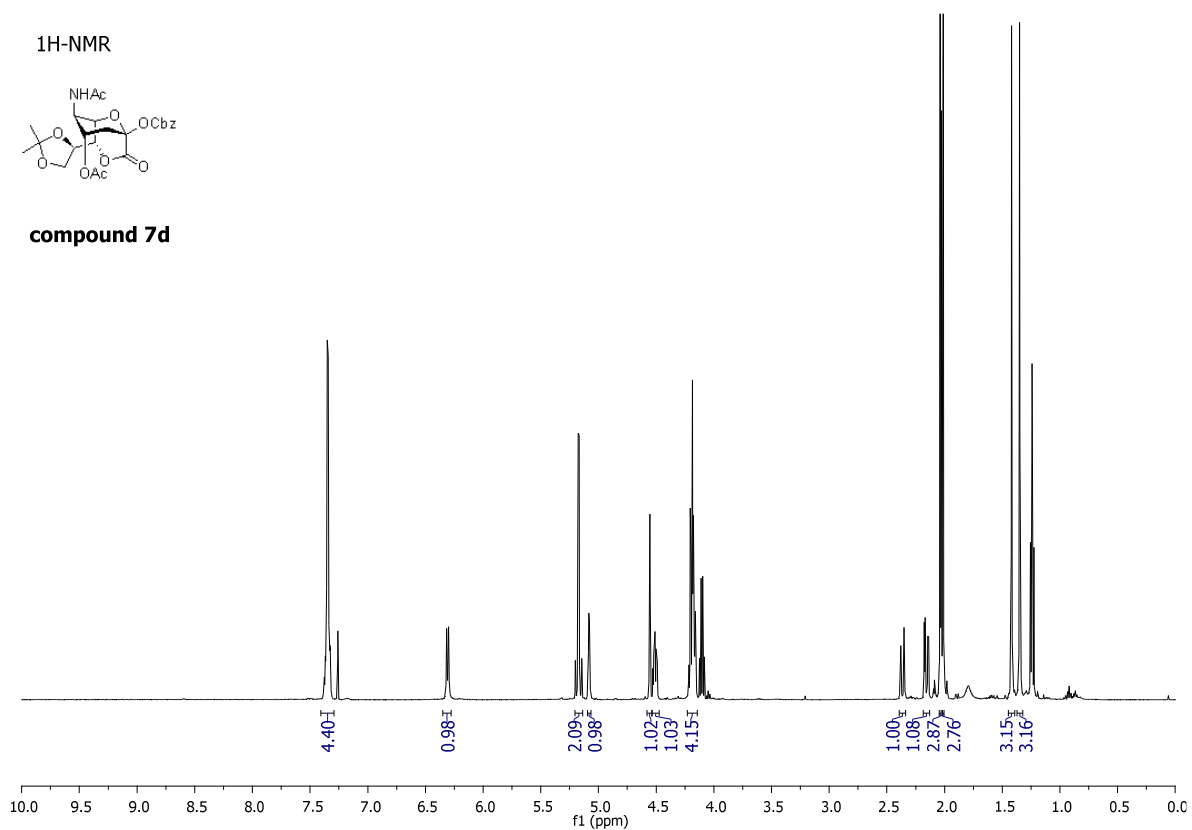

13C-NMR

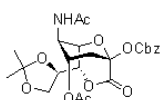

compound 7d

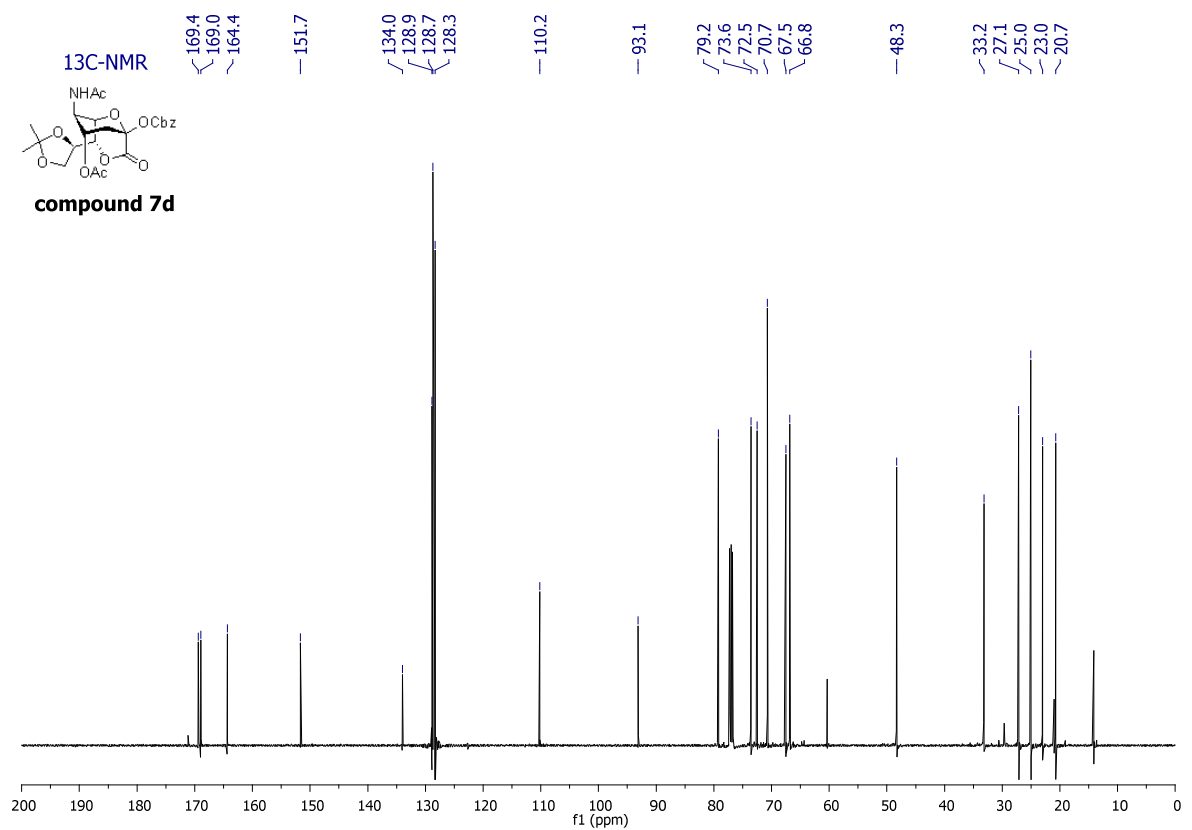

1H-NMR

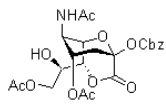

compound 7e

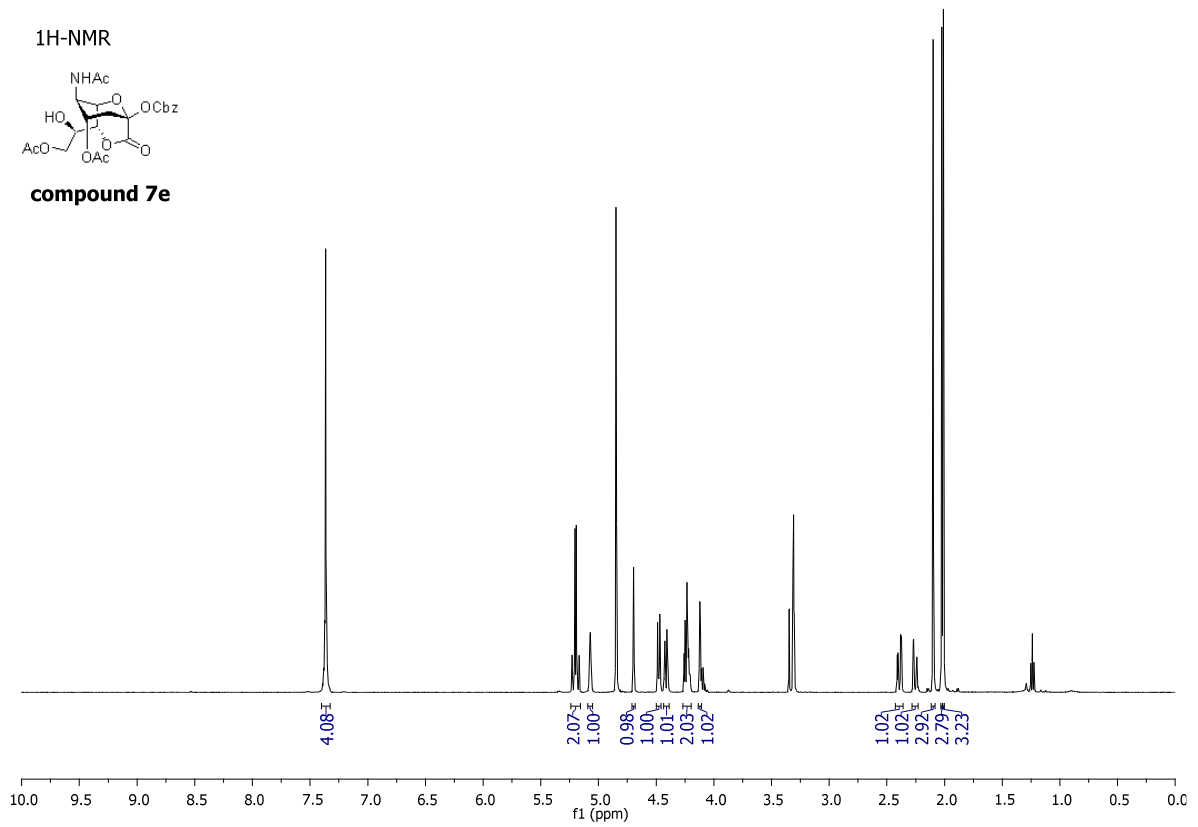

13C-NMR

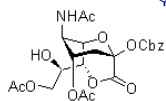

compound 7e

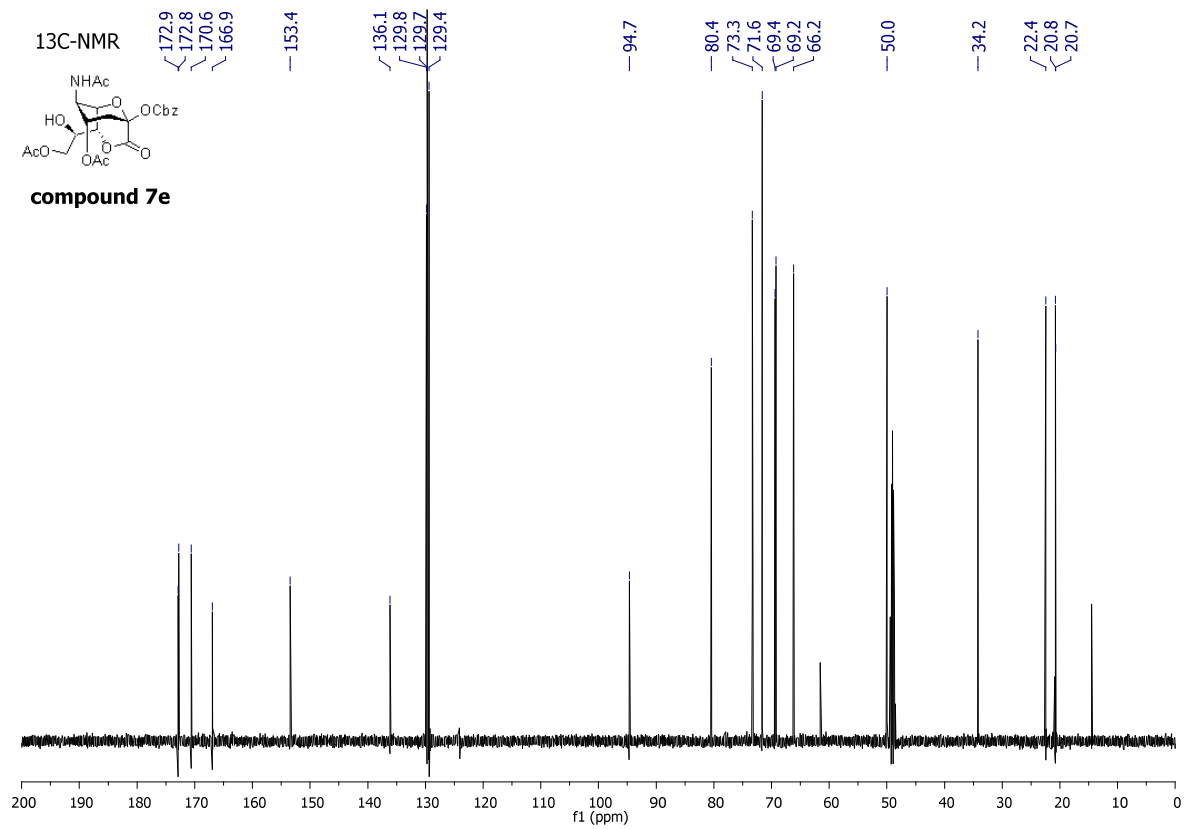



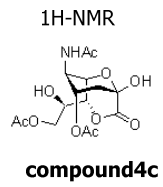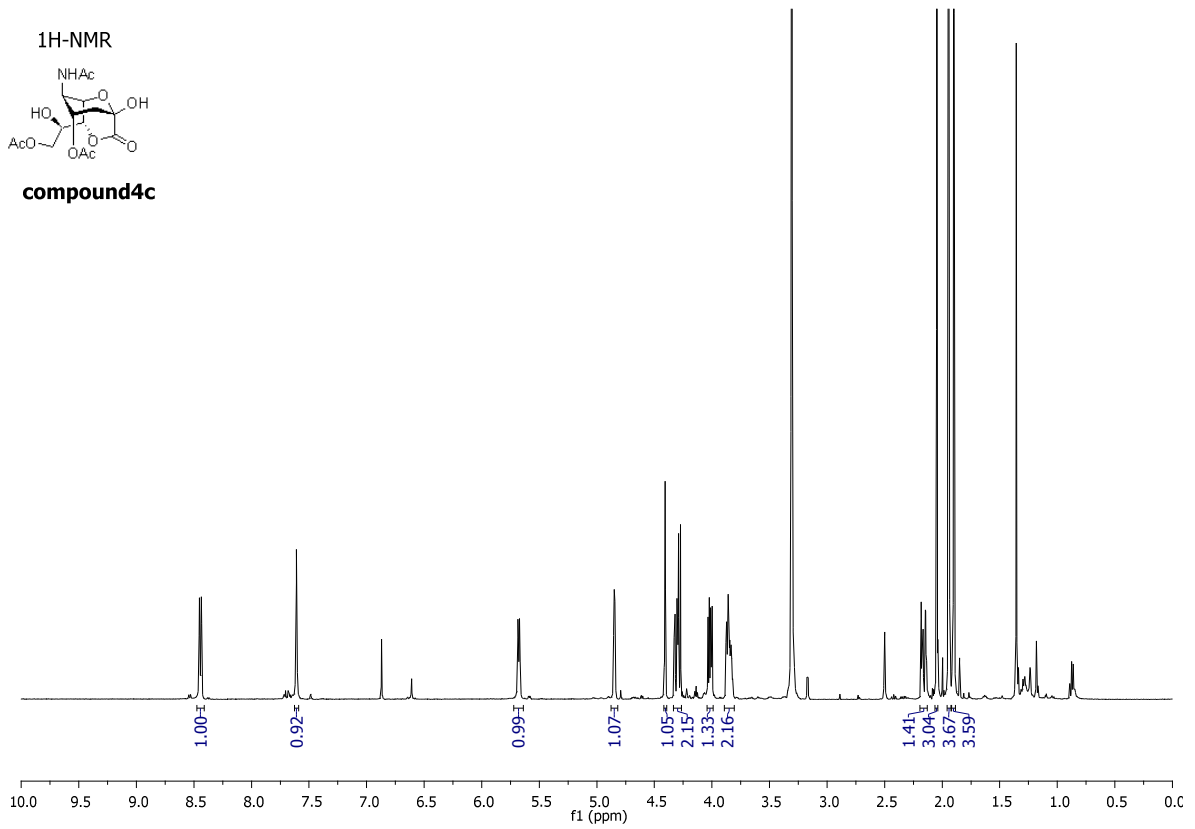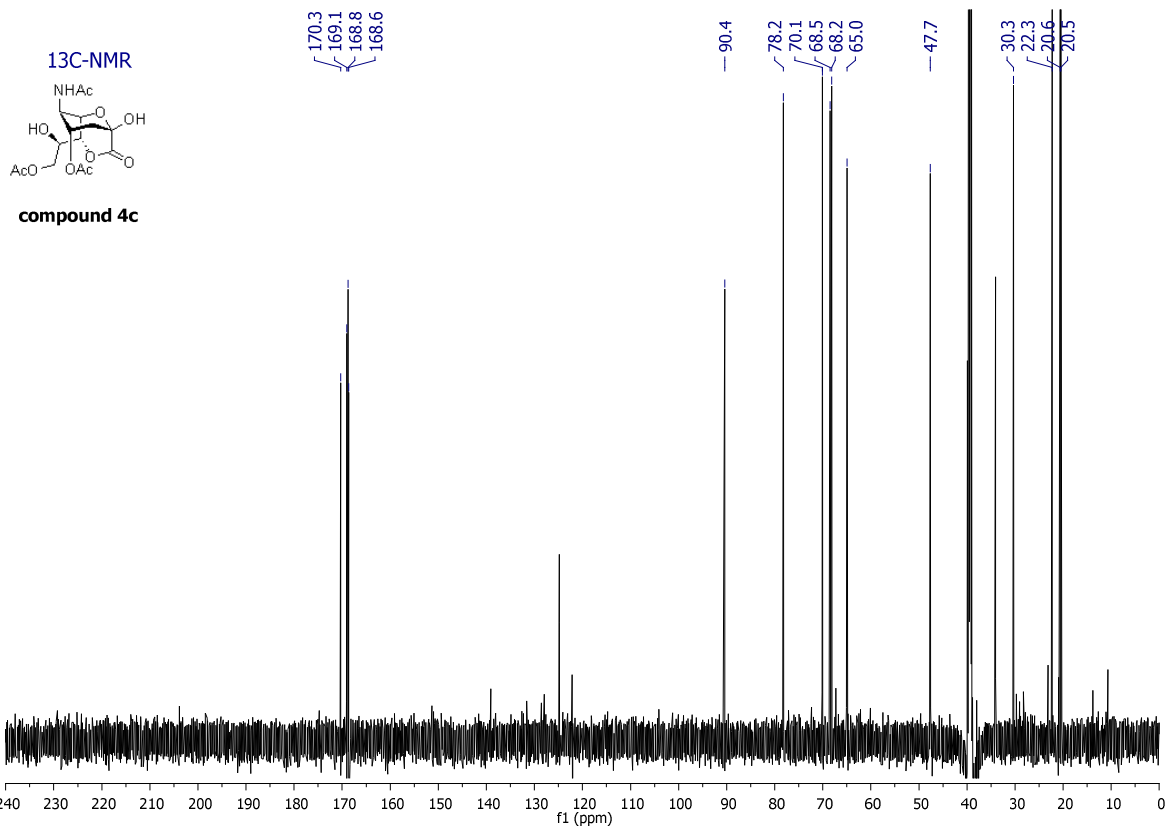

1H-NMR

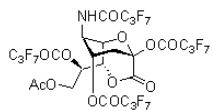

compound 8b

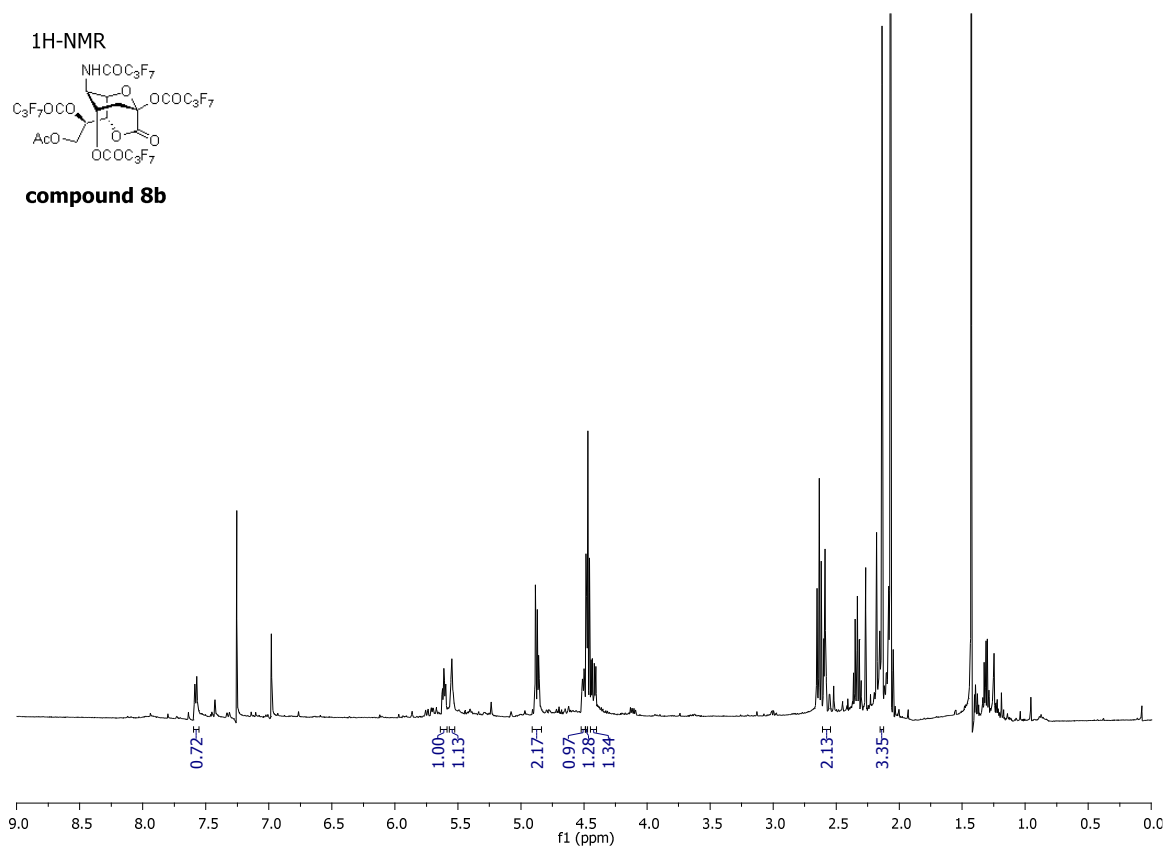

13C-NMR

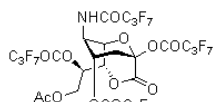

compound 8b

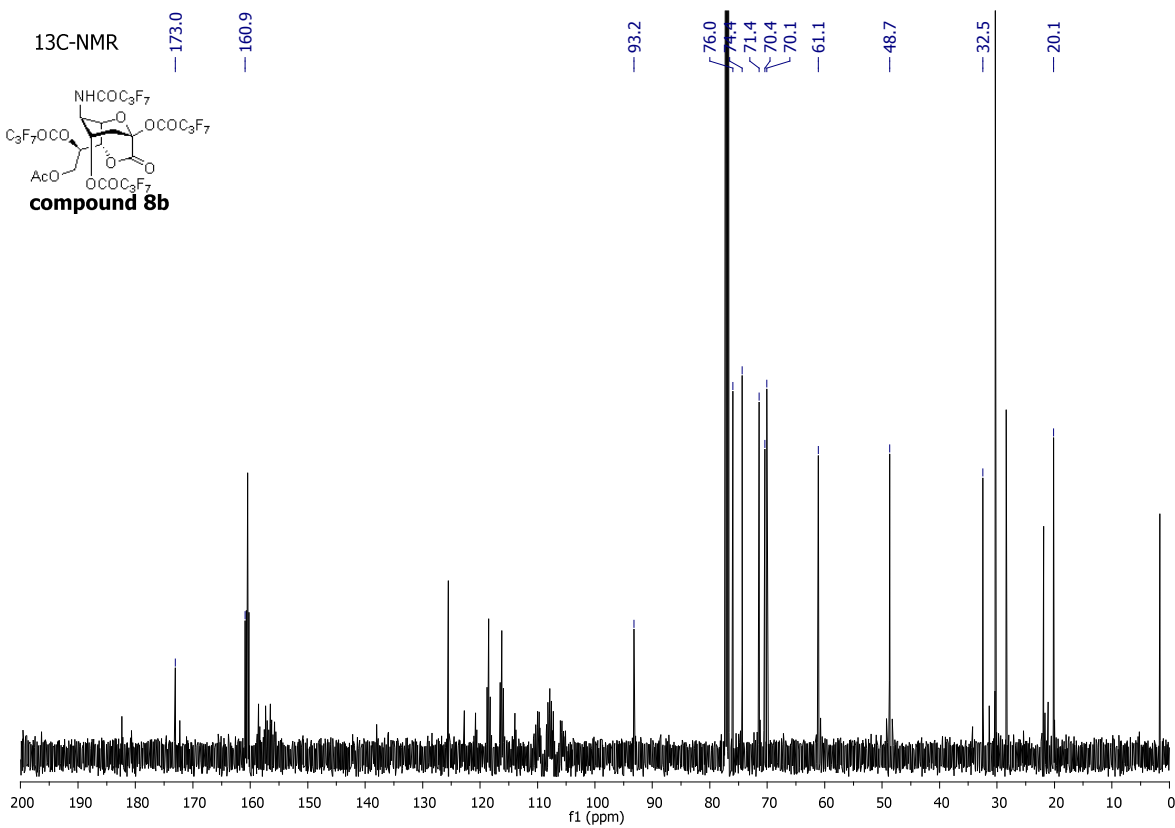

**<sup>1</sup>H-NMR**

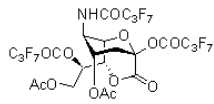

**compound 8c**

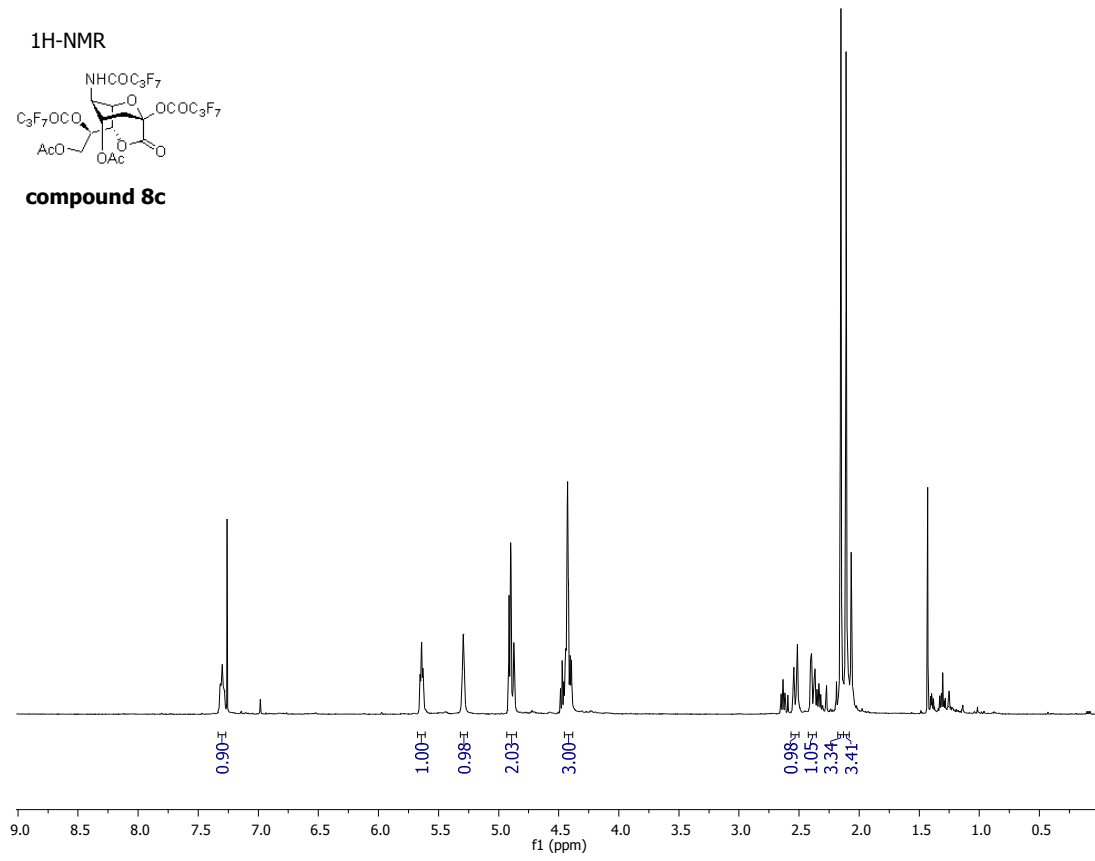

**<sup>13</sup>C-NMR**

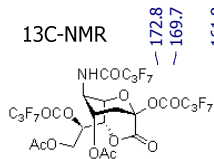

**compound 8c**

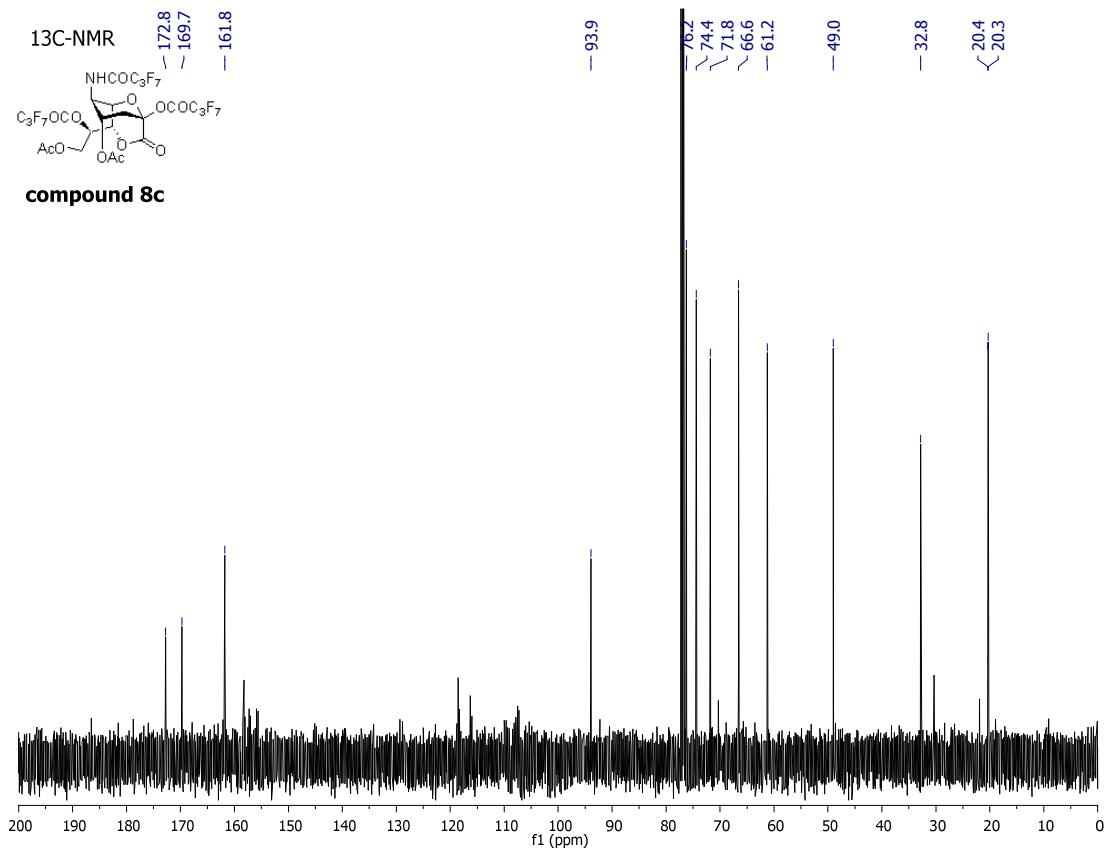

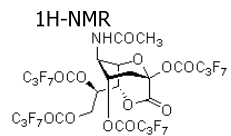

**compound 9a**

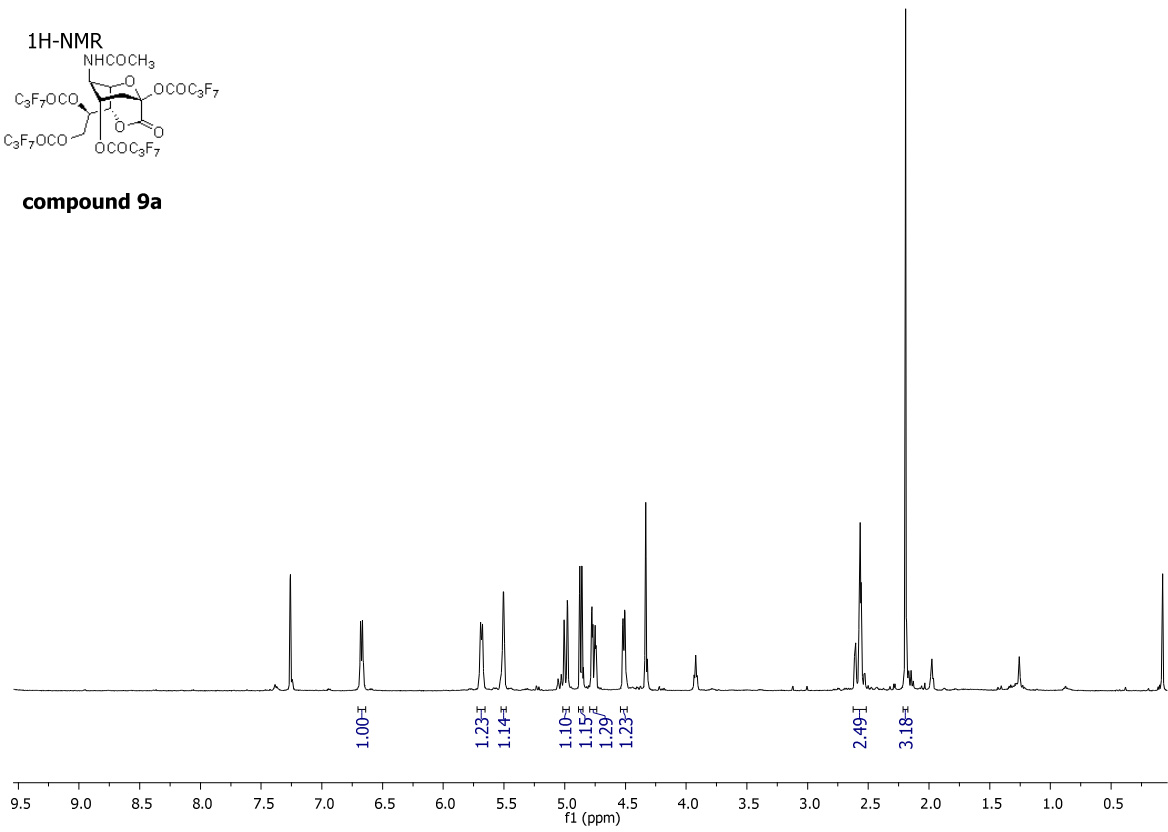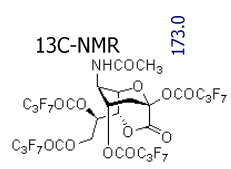

**compound 9a**

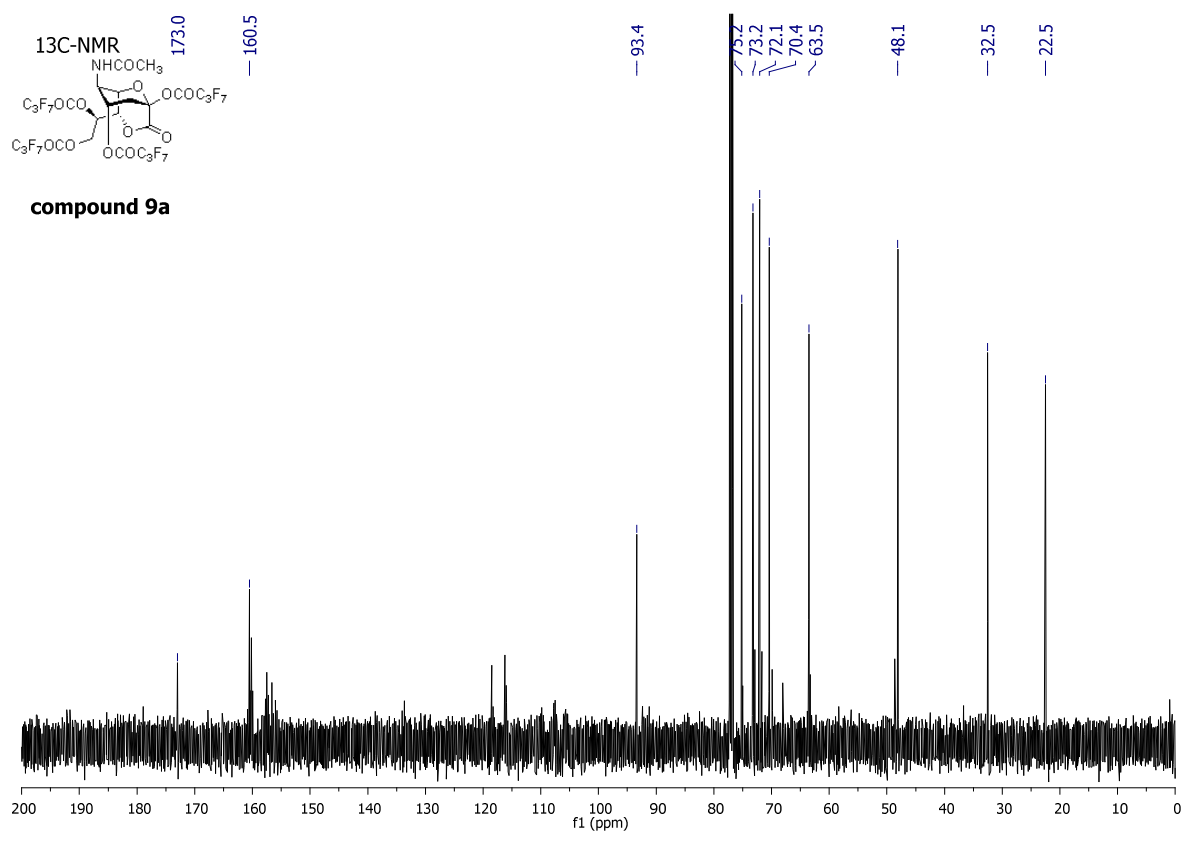

1H-NMR

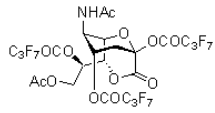

compound 9b

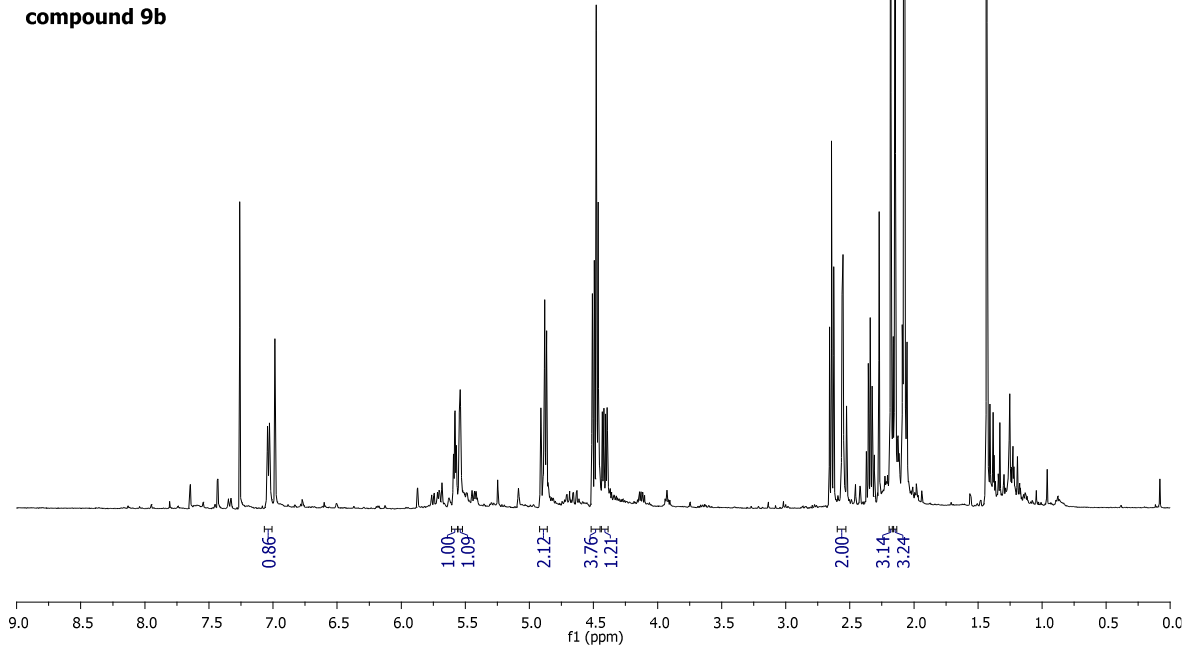

13C-NMR

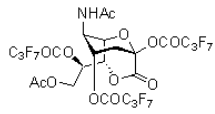

compound 9b

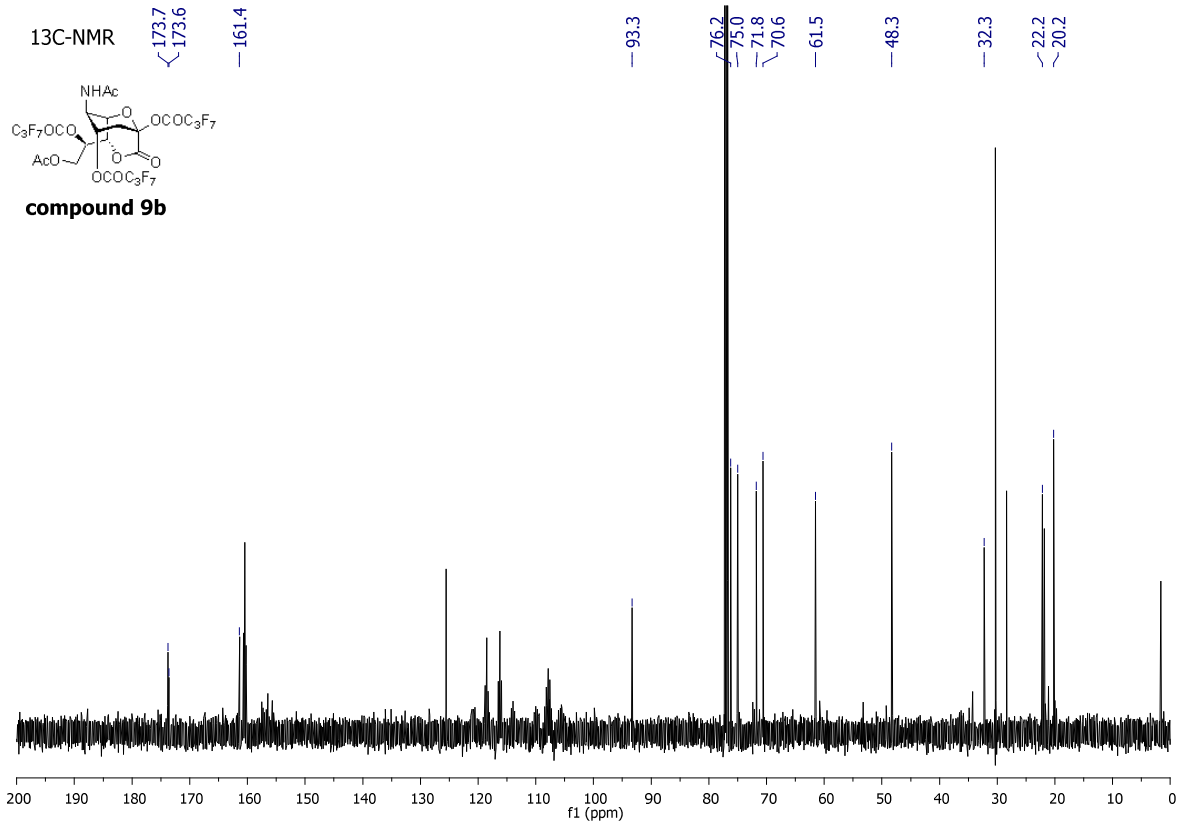

1H-NMR

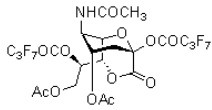

compound 9c

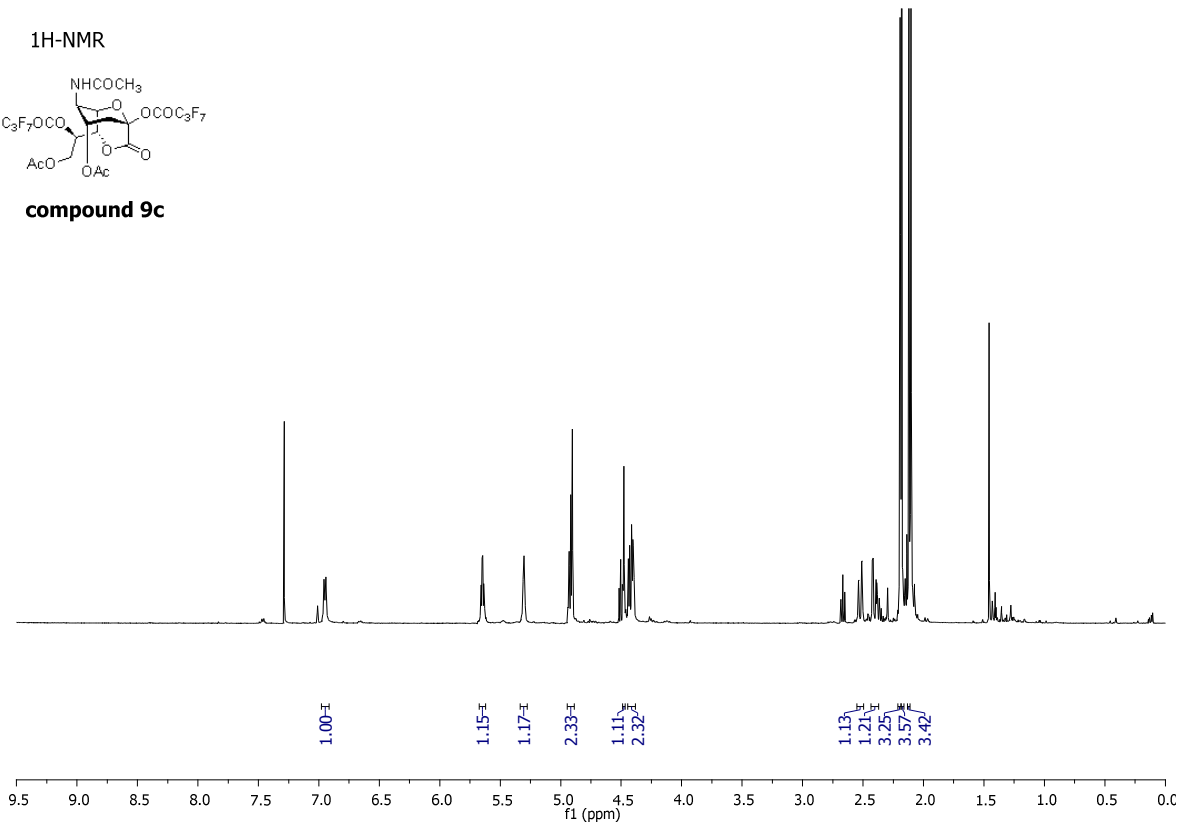

13C-NMR

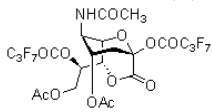

compound 9c

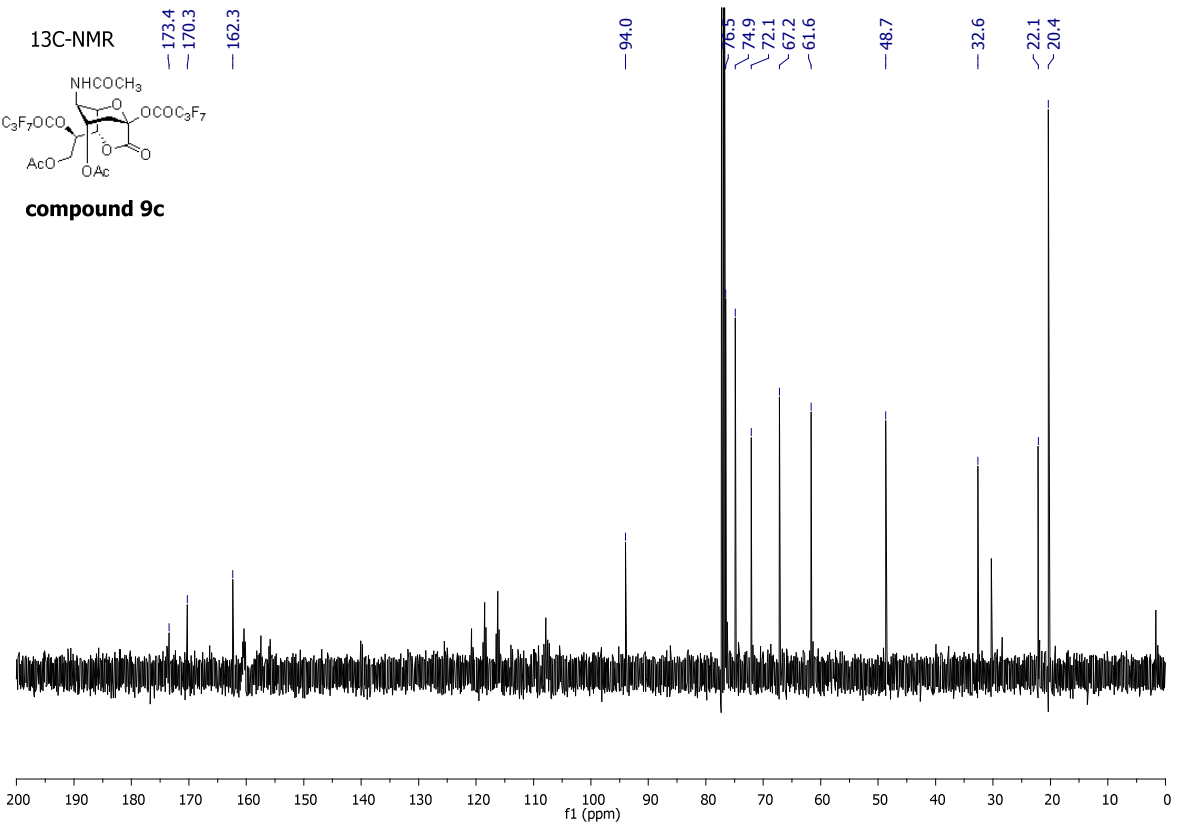

A)

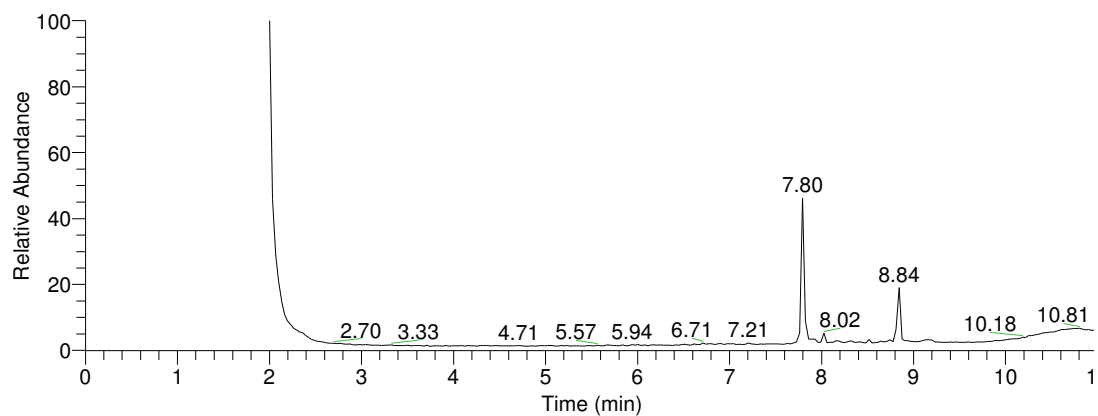

B)

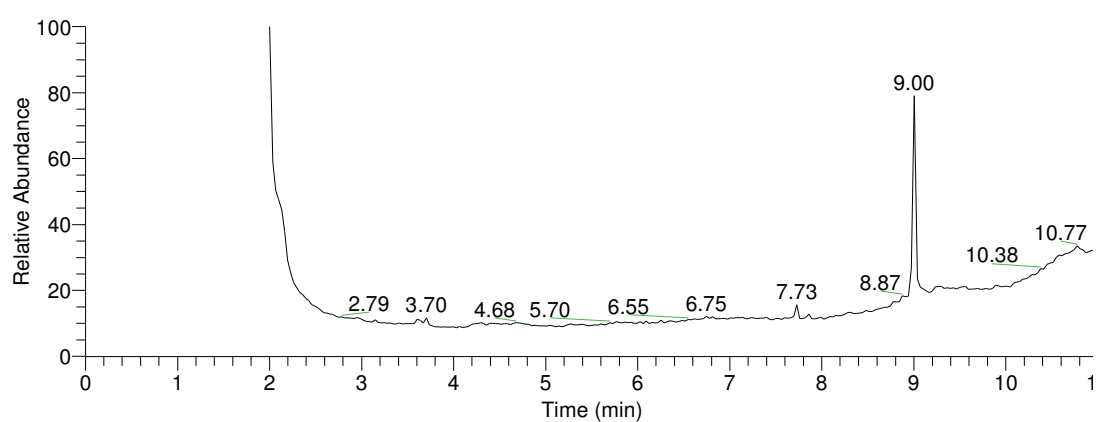

C)

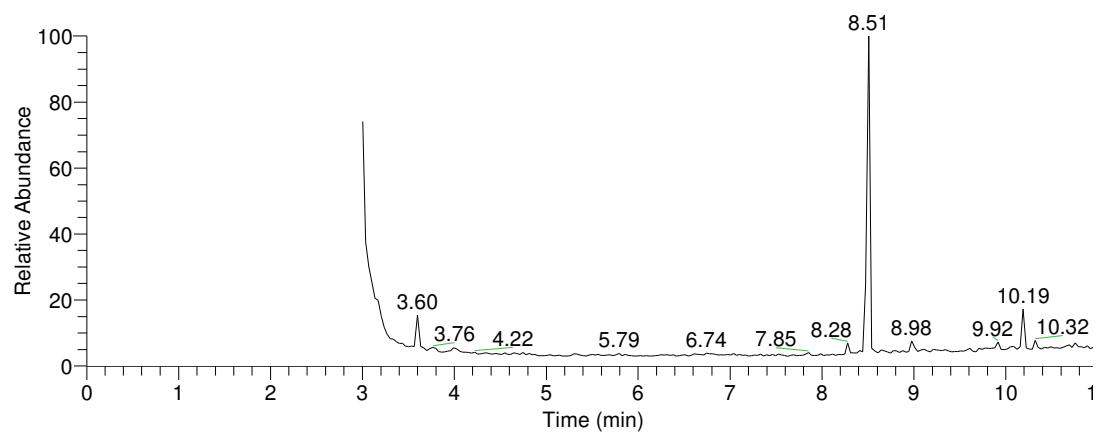

Fig. 1S. Total ion chromatograms of products obtained by HFBA derivatization (HFBA, MeCN, 150°C, 5 min) of (A) methyl ester of acid **1a**, (B) methyl ester of acid **1b** and (C) methyl ester of acid **1c**.

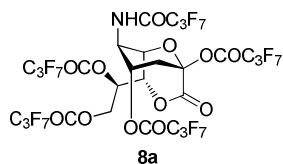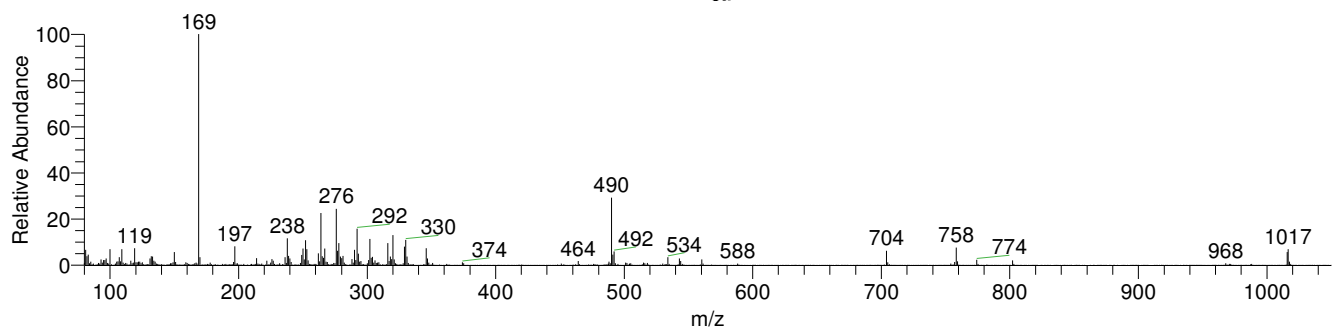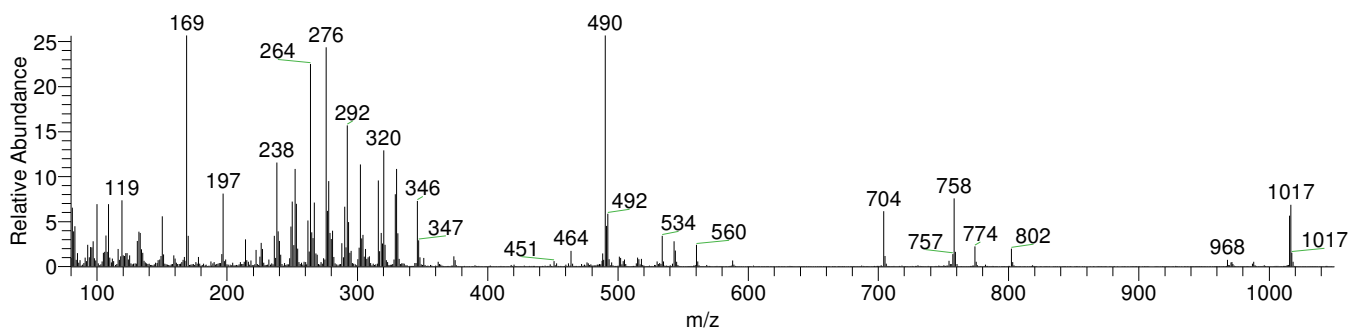

EI mass spectrum of lactone **8a** obtained by derivatization (HFBA, MeCN, 150 °C, 5 min) of the corresponding acid **1a** or of the lactone **4a**

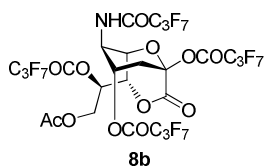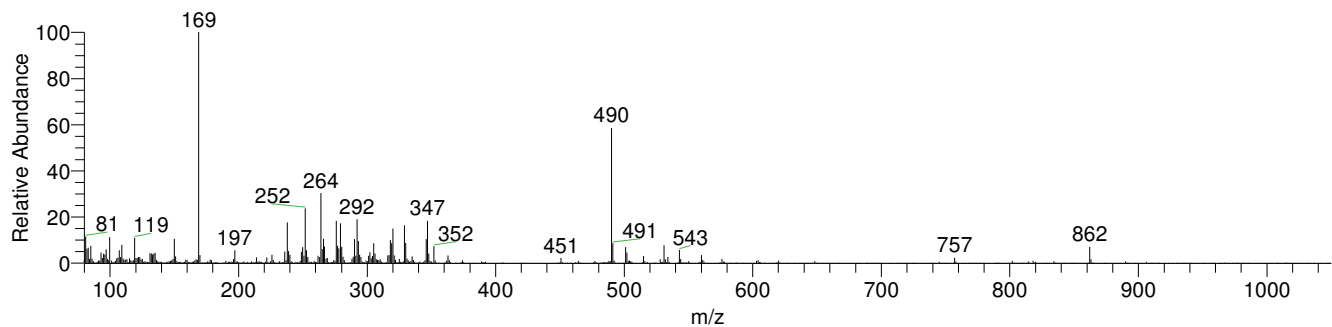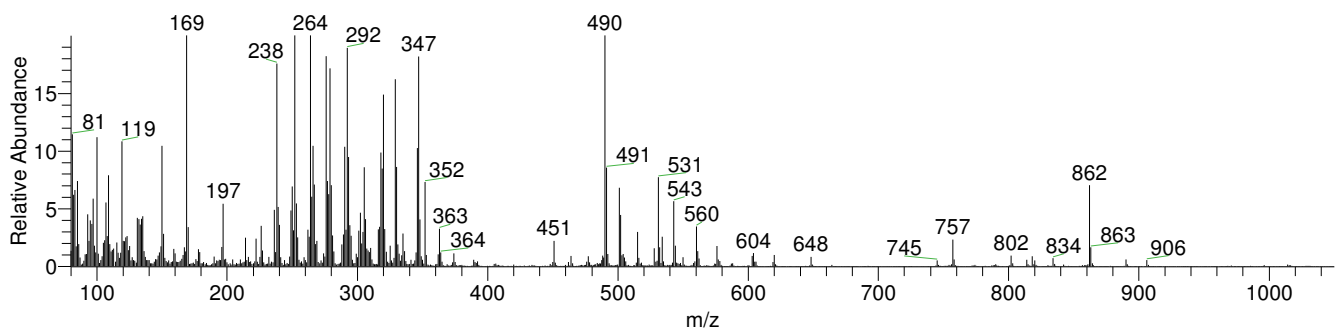

EI mass spectrum of lactone **8b** obtained by derivatization (HFBA, MeCN, 150 °C, 5 min) of the corresponding acid **1b** or of the lactone **4b**



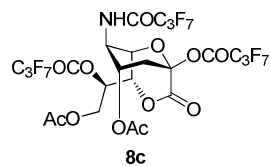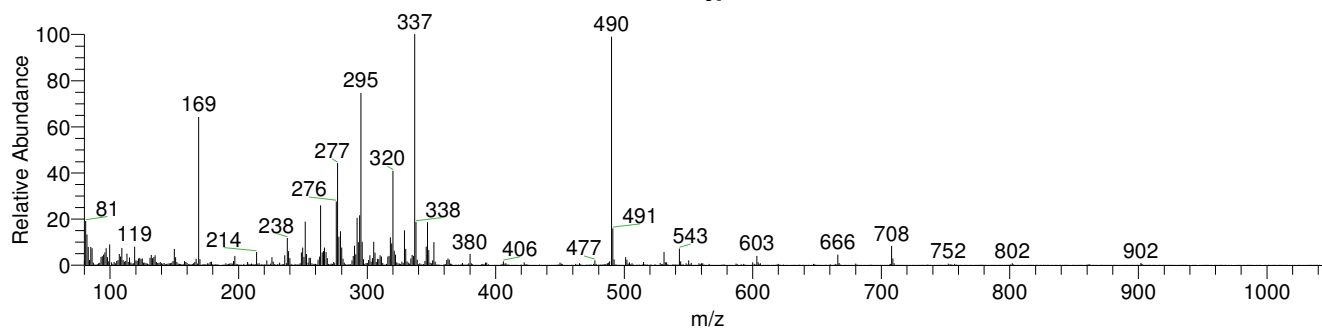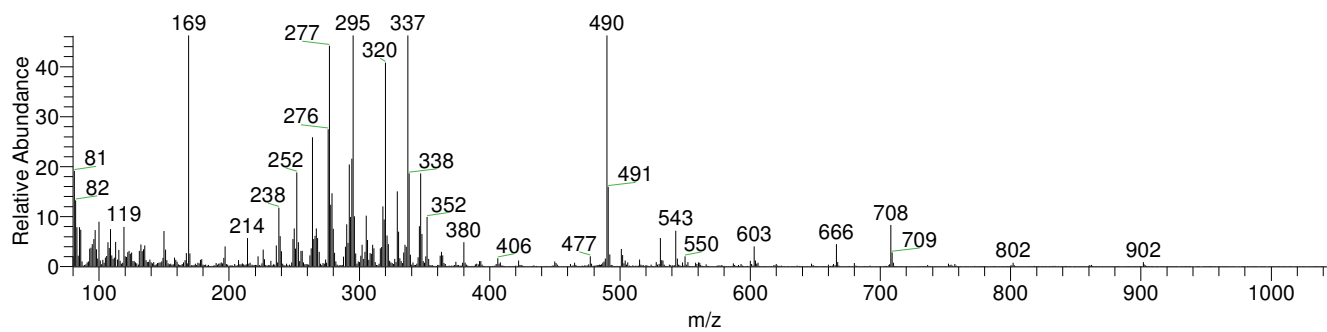

EI mass spectrum of lactone **8c** obtained by derivatization (HFBA, MeCN, 150 °C, 5 min) of the corresponding acid **1c** or of the lactone **4c**.

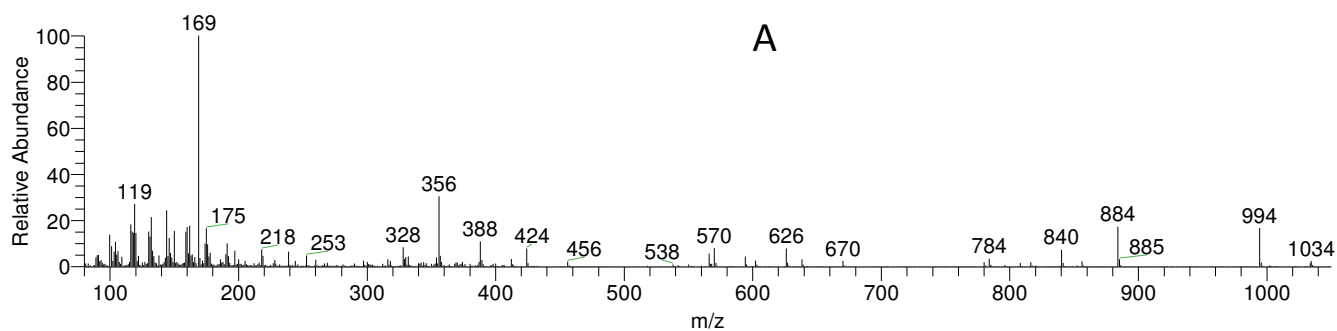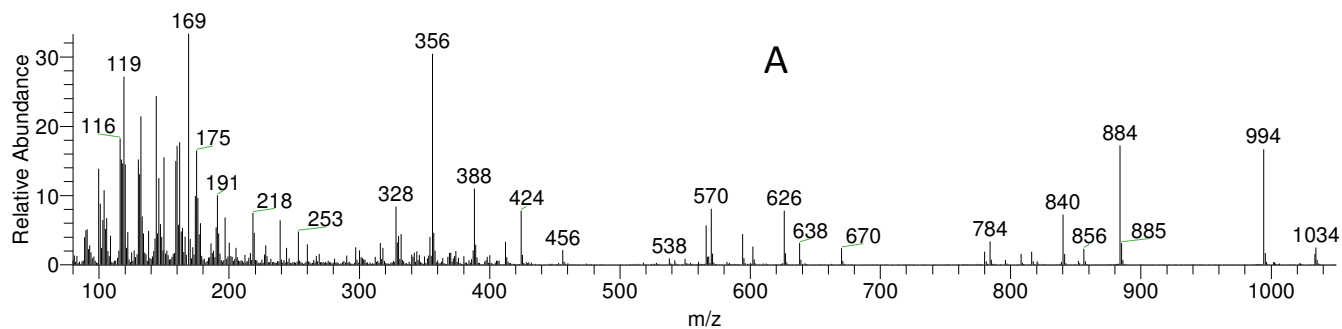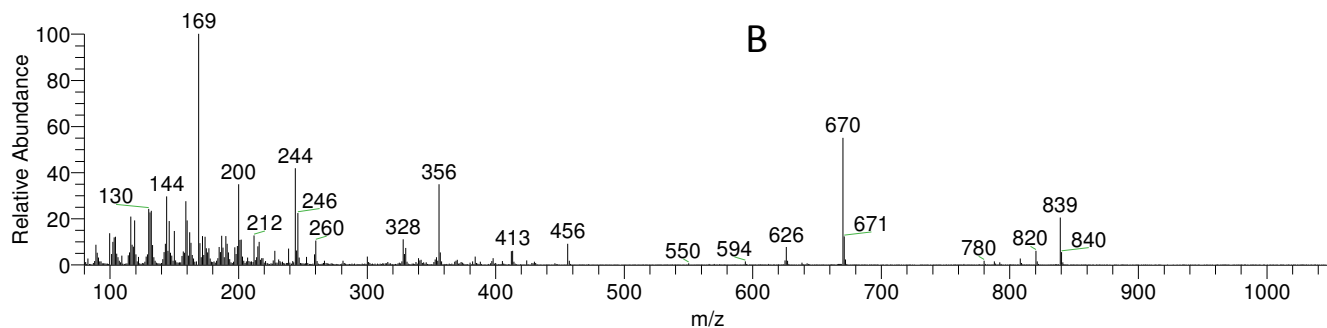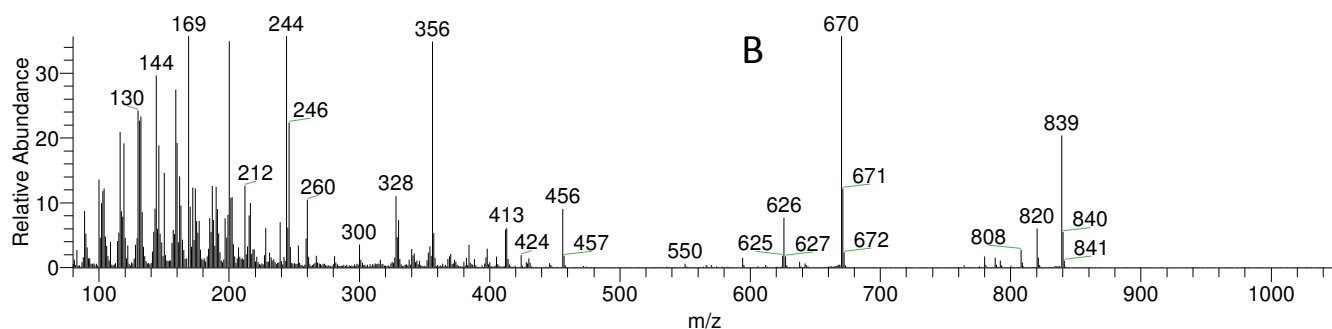

EI mass spectra obtained after derivatization (HFBA, MeCN, 150 °C, 5 min) of the methyl ester of sialic acid **1a**. A and B represent the mass spectra of peaks at 7.85 and 8.86 min of derivative of methyl ester of **1a**

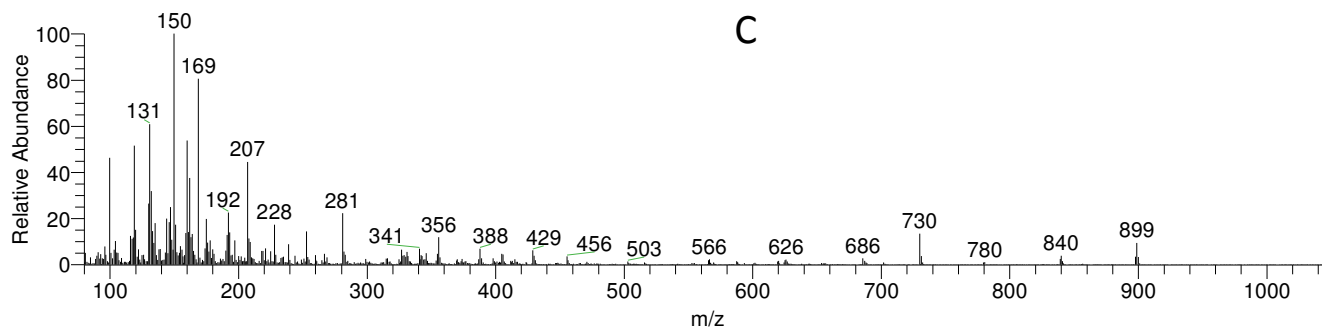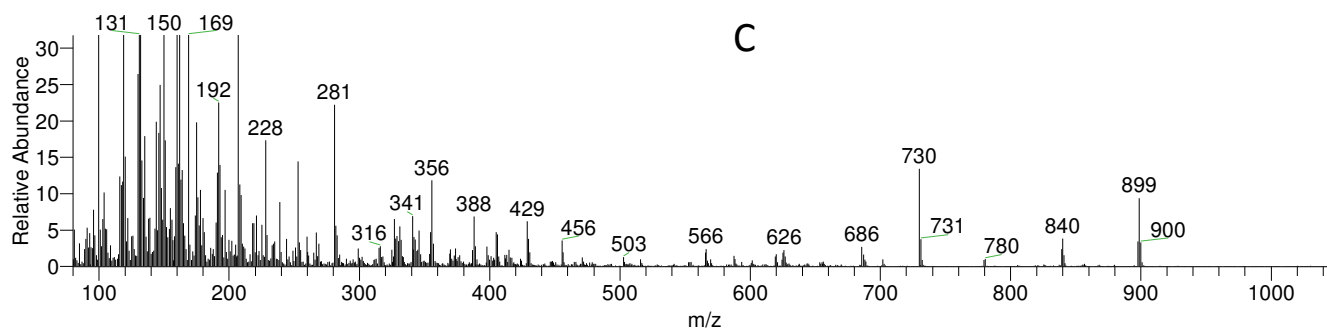

EI mass spectra obtained after derivatization (HFBA, MeCN, 150 °C, 5 min) of the methyl ester of sialic acid **1b**. C represent the mass spectrum of peak at 9.00 min of derivative of methyl ester of **1b**.

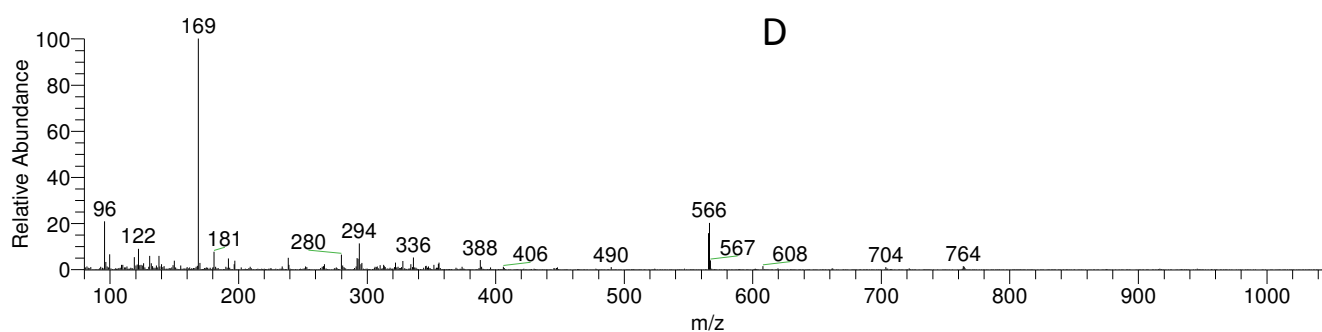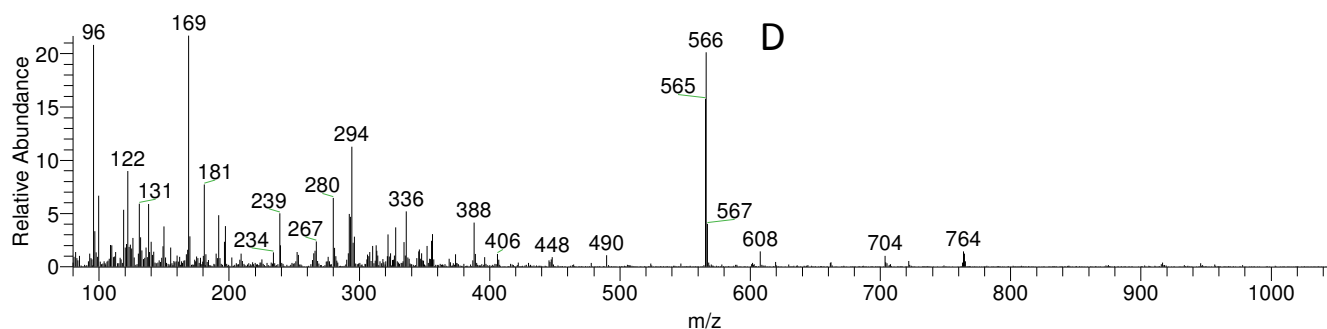

EI mass spectra obtained after derivatization (HFBA, MeCN, 150 °C, 5 min) of the methyl ester of sialic acid **1c**. D represent the mass spectrum of peak at 8.51 min of derivative of methyl ester of **1c**.

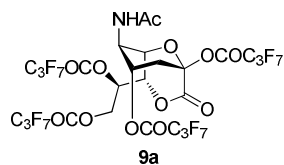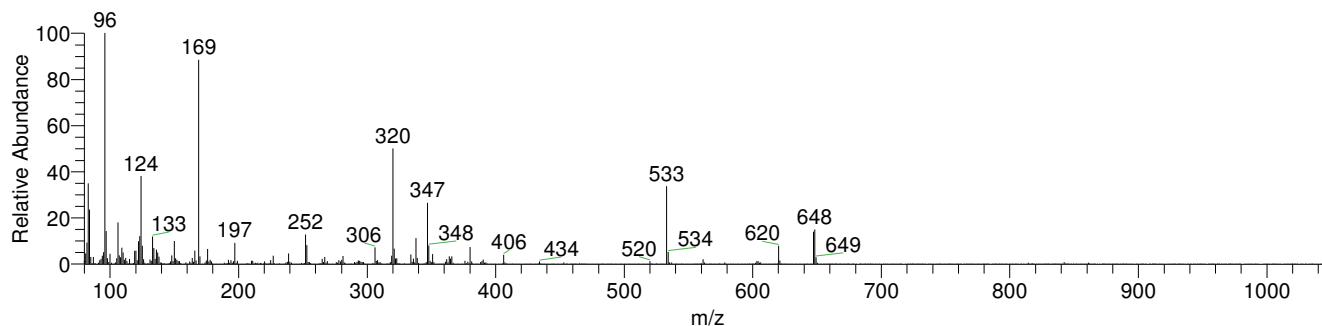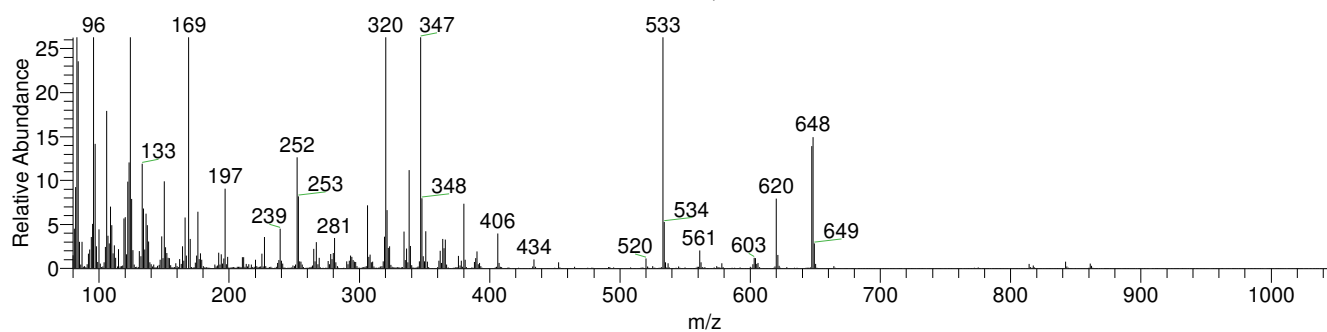

EI mass spectra of lactone **9a** obtained by derivatization with HFBA at 23°C the acids **1a** and the lactones **4a**.

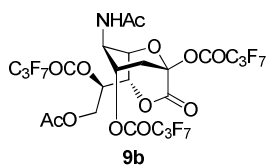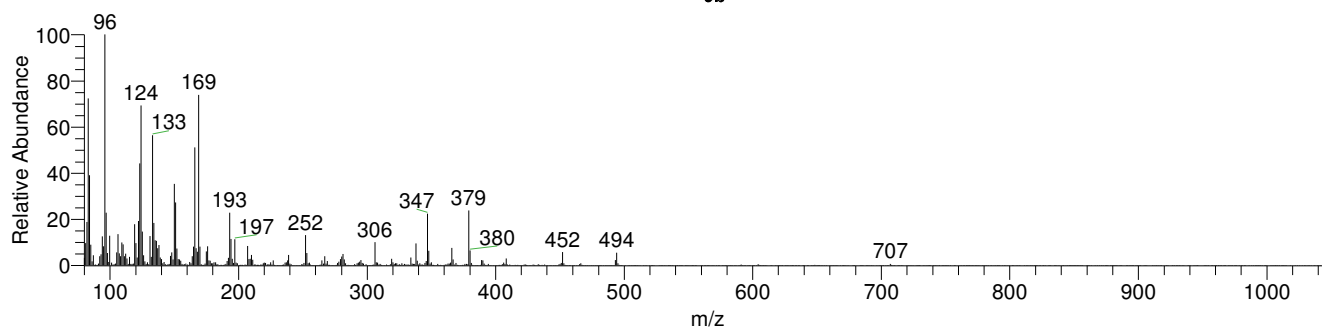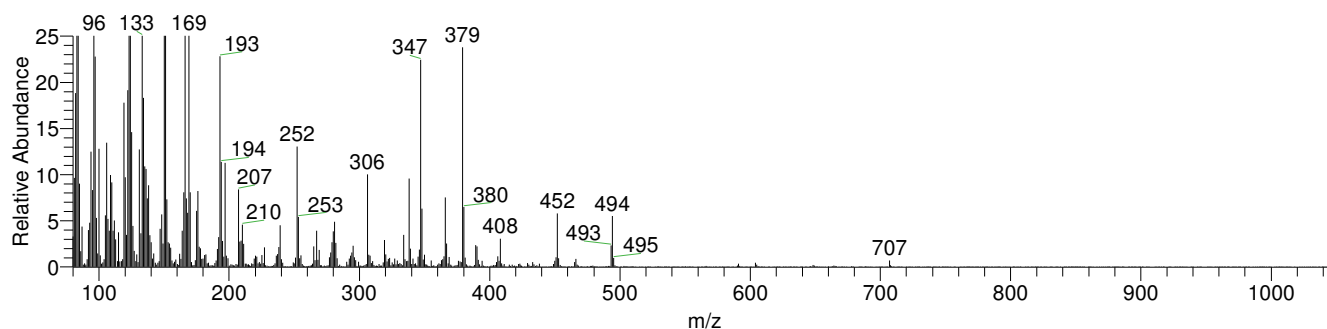

EI mass spectra of lactone **9b** obtained by derivatization with HFBA at 23°C the acids **1b** and the lactones **4b**.

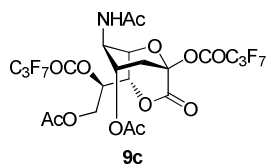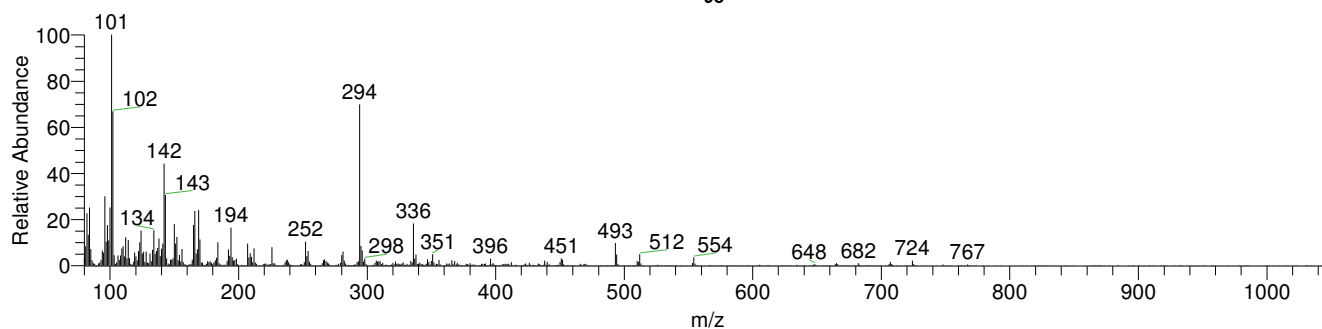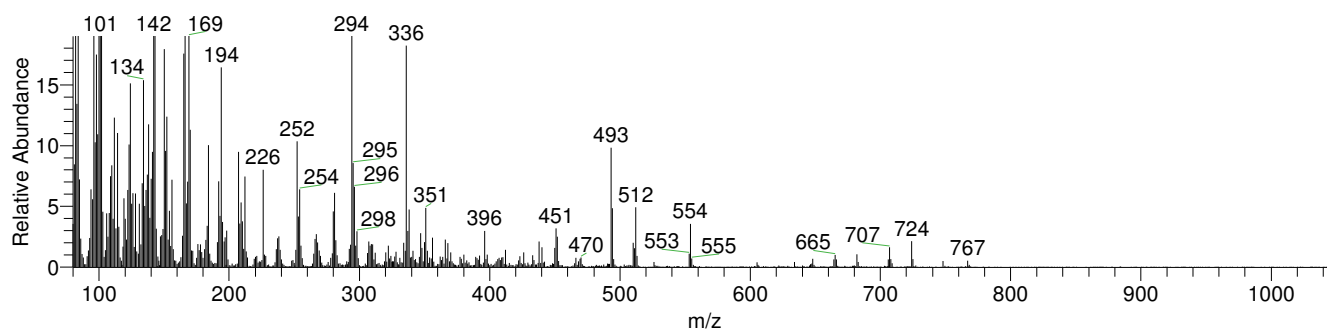

EI mass spectra of lactone **9c** obtained by derivatization with HFBA at 23°C the acids **1c** and the lactones **4c**.
